# Supplementary material for: Identification of Cassiopea sp. in Lake Macquarie, Australia and revision of the taxonomic status of Cassiopea maremetens Gershwin, Zeidler & Davie, 2010 (Cnidaria: Scyphozoa: Cassiopeidae)
Source: PeerJ. 2025 Jul 18;13:e19669. doi: 10.7717/peerj.19669 (PMC12278942; doi:10.7717/peerj.19669)
Supplement: Supplemental Information 4 [file peerj-13-19669-s004.xlsx]

## Sheet: MatrixOutput
	Aurelia_aurita	C_andromeda_Angas_Inlet_SA_1	C_andromeda_Angas_Inlet_SA_2	C_andromeda_Angas_Inlet_SA_3	C_andromeda_Angas_Inlet_SA_4	C_andromeda_Angas_Inlet_SA_5	C_andromeda_Angas_Inlet_SA_6	C_andromeda_Angas_Inlet_SA_7	Gold_Coast_QLD_1	Gold_Coast_QLD_2	Moreton_Bay_QLD_1	Moreton_Bay_QLD_2	Moreton_Bay_QLD_3	Moreton_Bay_QLD_4	Pelican_Waters_QLD_1	Pelican_Waters_QLD_2	Wallis_Lake_NSW_1	Wallis_Lake_NSW_10	Wallis_Lake_NSW_2	Wallis_Lake_NSW_3	Wallis_Lake_NSW_4	Wallis_Lake_NSW_5	Wallis_Lake_NSW_6	Wallis_Lake_NSW_7	Wallis_Lake_NSW_8	Wallis_Lake_NSW_9	C_ndrosia_Lake_Illawarra_NSW	C_sp_Lizard_Is_QLD	C_sp_Townsville_QLD	C_sp1_Port_Douglas_QLD	C_sp3_Coombabah_Creek_QLD_1	C_sp3_Coombabah_Creek_QLD_2	C_sp3_Coombabah_Creek_QLD_3	C_sp3_Coombabah_Creek_QLD_4	C_sp3_Lake_Alexander_NT_1	C_sp3_Lake_Alexander_NT_2	C_sp_Port_Hacking_NSW_1	C_sp_Port_Hacking_NSW_2	Catostylus_mosaicus	Lake_Macquarie_NSW_1	Lake_Macquarie_NSW_2	Lake_Macquarie_NSW_3	Lake_Macquarie_NSW_4	Lake_Macquarie_NSW_5	Lake_Macquarie_NSW_6	Lake_Macquarie_NSW_7	Lake_Macquarie_NSW_8	Lake_Macquarie_NSW_9
Aurelia_aurita
C_andromeda_Angas_Inlet_SA_1	0.243531
C_andromeda_Angas_Inlet_SA_2	0.246689	0.00165563
C_andromeda_Angas_Inlet_SA_3	0.236462	0	0
C_andromeda_Angas_Inlet_SA_4	0.243531	0	0.00165563	0
C_andromeda_Angas_Inlet_SA_5	0.243531	0	0.00165563	0	0
C_andromeda_Angas_Inlet_SA_6	0.243531	0	0.00165563	0	0	0
C_andromeda_Angas_Inlet_SA_7	0.243531	0	0.00165289	0	0	0	0
Gold_Coast_QLD_1	0.226788	0.0638298	0.0695364	0.0684685	0.0638298	0.0638298	0.0638298	0.0638298
Gold_Coast_QLD_2	0.226788	0.0638298	0.0695364	0.0684685	0.0638298	0.0638298	0.0638298	0.0638298	0
Moreton_Bay_QLD_1	0.226788	0.0638298	0.0695364	0.0684685	0.0638298	0.0638298	0.0638298	0.0638298	0	0
Moreton_Bay_QLD_2	0.226788	0.0638298	0.0695364	0.0684685	0.0638298	0.0638298	0.0638298	0.0638298	0	0	0
Moreton_Bay_QLD_3	0.226788	0.0638298	0.0695364	0.0684685	0.0638298	0.0638298	0.0638298	0.0638298	0	0	0	0
Moreton_Bay_QLD_4	0.226788	0.0638298	0.0695364	0.0684685	0.0638298	0.0638298	0.0638298	0.0638298	0	0	0	0	0
Pelican_Waters_QLD_1	0.226788	0.0638298	0.0695364	0.0684685	0.0638298	0.0638298	0.0638298	0.0638298	0	0	0	0	0	0
Pelican_Waters_QLD_2	0.229133	0.0671031	0.0695364	0.0728346	0.0671031	0.0671031	0.0671031	0.0671031	0	0	0	0	0	0	0
Wallis_Lake_NSW_1	0.226788	0.0638298	0.0695364	0.0684685	0.0638298	0.0638298	0.0638298	0.0638298	0	0	0	0	0	0	0	0
Wallis_Lake_NSW_10	0.226788	0.0638298	0.0695364	0.0684685	0.0638298	0.0638298	0.0638298	0.0638298	0	0	0	0	0	0	0	0	0
Wallis_Lake_NSW_2	0.226788	0.0638298	0.0695364	0.0684685	0.0638298	0.0638298	0.0638298	0.0638298	0	0	0	0	0	0	0	0	0	0
Wallis_Lake_NSW_3	0.226788	0.0638298	0.0695364	0.0684685	0.0638298	0.0638298	0.0638298	0.0638298	0	0	0	0	0	0	0	0	0	0	0
Wallis_Lake_NSW_4	0.227134	0.0639269	0.0696517	0.0685921	0.0639269	0.0639269	0.0639269	0.0639269	0	0	0	0	0	0	0	0	0	0	0	0
Wallis_Lake_NSW_5	0.226788	0.0638298	0.0695364	0.0684685	0.0638298	0.0638298	0.0638298	0.0638298	0	0	0	0	0	0	0	0	0	0	0	0	0
Wallis_Lake_NSW_6	0.226788	0.0638298	0.0695364	0.0684685	0.0638298	0.0638298	0.0638298	0.0638298	0	0	0	0	0	0	0	0	0	0	0	0	0	0
Wallis_Lake_NSW_7	0.226788	0.0638298	0.0695364	0.0684685	0.0638298	0.0638298	0.0638298	0.0638298	0	0	0	0	0	0	0	0	0	0	0	0	0	0	0
Wallis_Lake_NSW_8	0.226788	0.0638298	0.0695364	0.0684685	0.0638298	0.0638298	0.0638298	0.0638298	0	0	0	0	0	0	0	0	0	0	0	0	0	0	0	0
Wallis_Lake_NSW_9	0.226788	0.0638298	0.0695364	0.0684685	0.0638298	0.0638298	0.0638298	0.0638298	0	0	0	0	0	0	0	0	0	0	0	0	0	0	0	0	0
C_ndrosia_Lake_Illawarra_NSW	0.211568	0.164134	0.162252	0.163964	0.164134	0.164134	0.164134	0.164134	0.156535	0.156535	0.156535	0.156535	0.156535	0.156535	0.156535	0.153846	0.156535	0.156535	0.156535	0.156535	0.156773	0.156535	0.156535	0.156535	0.156535	0.156535
C_sp_Lizard_Is_QLD	0.237443	0.170213	0.172185	0.176577	0.170213	0.170213	0.170213	0.170213	0.170213	0.170213	0.170213	0.170213	0.170213	0.170213	0.170213	0.168576	0.170213	0.170213	0.170213	0.170213	0.170472	0.170213	0.170213	0.170213	0.170213	0.170213	0.161094
C_sp_Townsville_QLD	0.226788	0.0638298	0.0695364	0.0684685	0.0638298	0.0638298	0.0638298	0.0638298	0	0	0	0	0	0	0	0	0	0	0	0	0	0	0	0	0	0	0.156535	0.170213
C_sp1_Port_Douglas_QLD	0.245528	0.162602	0.163763	0.164207	0.162602	0.162602	0.162602	0.162602	0.16748	0.16748	0.16748	0.16748	0.16748	0.16748	0.16748	0.166954	0.16748	0.16748	0.16748	0.16748	0.167752	0.16748	0.16748	0.16748	0.16748	0.16748	0.169106	0.162602	0.16748
C_sp3_Coombabah_Creek_QLD_1	0.21044	0.164763	0.166942	0.164706	0.164763	0.164763	0.164763	0.166124	0.158238	0.158238	0.158238	0.158238	0.158238	0.158238	0.158238	0.157119	0.158238	0.158238	0.158238	0.158238	0.158497	0.158238	0.158238	0.158238	0.158238	0.158238	0.00489396	0.159869	0.158238	0.174957
C_sp3_Coombabah_Creek_QLD_2	0.218654	0.164885	0.164725	0.163964	0.164885	0.164885	0.164885	0.164885	0.160305	0.160305	0.160305	0.160305	0.160305	0.160305	0.160305	0.159539	0.160305	0.160305	0.160305	0.160305	0.16055	0.160305	0.160305	0.160305	0.160305	0.160305	0.00610687	0.160305	0.160305	0.173984	0.00655738
C_sp3_Coombabah_Creek_QLD_3	0.218654	0.164885	0.164725	0.163964	0.164885	0.164885	0.164885	0.164885	0.160305	0.160305	0.160305	0.160305	0.160305	0.160305	0.160305	0.159539	0.160305	0.160305	0.160305	0.160305	0.16055	0.160305	0.160305	0.160305	0.160305	0.160305	0.00610687	0.160305	0.160305	0.173984	0.00655738	0
C_sp3_Coombabah_Creek_QLD_4	0.217125	0.166412	0.166389	0.165766	0.166412	0.166412	0.166412	0.166412	0.158779	0.158779	0.158779	0.158779	0.158779	0.158779	0.158779	0.157895	0.158779	0.158779	0.158779	0.158779	0.159021	0.158779	0.158779	0.158779	0.158779	0.158779	0.00458015	0.161832	0.158779	0.172358	0.00491803	0.00152672	0.00152672
C_sp3_Lake_Alexander_NT_1	0.215596	0.160305	0.154742	0.16036	0.160305	0.160305	0.160305	0.160305	0.164885	0.164885	0.164885	0.164885	0.164885	0.164885	0.164885	0.159539	0.164885	0.164885	0.164885	0.164885	0.165138	0.164885	0.164885	0.164885	0.164885	0.164885	0.0381679	0.149618	0.164885	0.17561	0.0327869	0.0442748	0.0442748	0.0427481
C_sp3_Lake_Alexander_NT_2	0.207339	0.150459	0.150459	0.154309	0.150459	0.150459	0.150459	0.150459	0.148624	0.148624	0.148624	0.148624	0.148624	0.148624	0.148624	0.148624	0.148624	0.148624	0.148624	0.148624	0.148897	0.148624	0.148624	0.148624	0.148624	0.148624	0.0311927	0.144954	0.148624	0.170642	0.0311927	0.0366972	0.0366972	0.0348624	0.00183486
C_sp_Port_Hacking_NSW_1	0.215596	0.161832	0.156406	0.162162	0.161832	0.161832	0.161832	0.161832	0.163359	0.163359	0.163359	0.163359	0.163359	0.163359	0.163359	0.157895	0.163359	0.163359	0.163359	0.163359	0.163609	0.163359	0.163359	0.163359	0.163359	0.163359	0.0366412	0.151145	0.163359	0.177236	0.0311475	0.0427481	0.0427481	0.0412214	0.00152672	0
C_sp_Port_Hacking_NSW_2	0.211568	0.164384	0.162252	0.16426	0.164384	0.164384	0.164384	0.164384	0.156773	0.156773	0.156773	0.156773	0.156773	0.156773	0.156773	0.153846	0.156773	0.156773	0.156773	0.156773	0.157012	0.156773	0.156773	0.156773	0.156773	0.156773	0	0.161339	0.156773	0.169106	0.00489396	0.00611621	0.00611621	0.00458716	0.0382263	0.0311927	0.0366972
Catostylus_mosaicus	0.204248	0.236928	0.240066	0.223969	0.236928	0.236928	0.236928	0.236928	0.228758	0.228758	0.228758	0.228758	0.228758	0.228758	0.228758	0.229133	0.228758	0.228758	0.228758	0.228758	0.229133	0.228758	0.228758	0.228758	0.228758	0.228758	0.20098	0.21732	0.228758	0.223368	0.20098	0.206897	0.206897	0.205255	0.206897	0.190826	0.208539	0.20098
Lake_Macquarie_NSW_1	0.226788	0.0638298	0.0695364	0.0684685	0.0638298	0.0638298	0.0638298	0.0638298	0	0	0	0	0	0	0	0	0	0	0	0	0	0	0	0	0	0	0.156535	0.170213	0	0.16748	0.158238	0.160305	0.160305	0.158779	0.164885	0.148624	0.163359	0.156773	0.228758
Lake_Macquarie_NSW_2	0.226788	0.0638298	0.0695364	0.0684685	0.0638298	0.0638298	0.0638298	0.0638298	0	0	0	0	0	0	0	0	0	0	0	0	0	0	0	0	0	0	0.156535	0.170213	0	0.16748	0.158238	0.160305	0.160305	0.158779	0.164885	0.148624	0.163359	0.156773	0.228758	0
Lake_Macquarie_NSW_3	0.226788	0.0638298	0.0695364	0.0684685	0.0638298	0.0638298	0.0638298	0.0638298	0	0	0	0	0	0	0	0	0	0	0	0	0	0	0	0	0	0	0.156535	0.170213	0	0.16748	0.158238	0.160305	0.160305	0.158779	0.164885	0.148624	0.163359	0.156773	0.228758	0	0
Lake_Macquarie_NSW_4	0.226788	0.0638298	0.0695364	0.0684685	0.0638298	0.0638298	0.0638298	0.0638298	0	0	0	0	0	0	0	0	0	0	0	0	0	0	0	0	0	0	0.156535	0.170213	0	0.16748	0.158238	0.160305	0.160305	0.158779	0.164885	0.148624	0.163359	0.156773	0.228758	0	0	0
Lake_Macquarie_NSW_5	0.226788	0.0638298	0.0695364	0.0684685	0.0638298	0.0638298	0.0638298	0.0638298	0	0	0	0	0	0	0	0	0	0	0	0	0	0	0	0	0	0	0.156535	0.170213	0	0.16748	0.158238	0.160305	0.160305	0.158779	0.164885	0.148624	0.163359	0.156773	0.228758	0	0	0	0
Lake_Macquarie_NSW_6	0.226788	0.0638298	0.0695364	0.0684685	0.0638298	0.0638298	0.0638298	0.0638298	0	0	0	0	0	0	0	0	0	0	0	0	0	0	0	0	0	0	0.156535	0.170213	0	0.16748	0.158238	0.160305	0.160305	0.158779	0.164885	0.148624	0.163359	0.156773	0.228758	0	0	0	0	0
Lake_Macquarie_NSW_7	0.226788	0.0638298	0.0695364	0.0684685	0.0638298	0.0638298	0.0638298	0.0638298	0	0	0	0	0	0	0	0	0	0	0	0	0	0	0	0	0	0	0.156535	0.170213	0	0.16748	0.158238	0.160305	0.160305	0.158779	0.164885	0.148624	0.163359	0.156773	0.228758	0	0	0	0	0	0
Lake_Macquarie_NSW_8	0.227134	0.0639269	0.0696517	0.0684685	0.0639269	0.0639269	0.0639269	0.0639269	0	0	0	0	0	0	0	0	0	0	0	0	0	0	0	0	0	0	0.156773	0.170472	0	0.16748	0.158497	0.16055	0.16055	0.159021	0.165138	0.148624	0.163609	0.157012	0.227496	0	0	0	0	0	0	0
Lake_Macquarie_NSW_9	0.226788	0.0638298	0.0695364	0.0684685	0.0638298	0.0638298	0.0638298	0.0638298	0	0	0	0	0	0	0	0	0	0	0	0	0	0	0	0	0	0	0.156535	0.170213	0	0.16748	0.158238	0.160305	0.160305	0.158779	0.164885	0.148624	0.163359	0.156773	0.228758	0	0	0	0	0	0	0	0

## Sheet: Caption
Table. Estimates of Evolutionary Divergence between Sequences
The number of amino acid differences per site from between sequences are shown. This analysis involved 48 amino acid sequences. All ambiguous positions were removed for each sequence pair (pairwise deletion option). There were a total of 662 positions in
1. Kumar S., Stecher G., Li M., Knyaz C., and Tamura K. (2018). MEGA X: Molecular Evolutionary Genetics Analysis across computing platforms. Molecular Biology and Evolution 35:1547-1549.
2. Stecher G., Tamura K., and Kumar S. (2020). Molecular Evolutionary Genetics Analysis (MEGA) for macOS. Molecular Biology and Evolution (https://doi.org/10.1093/molbev/msz312).
Disclaimer: Although utmost care has been taken to ensure the correctness of the caption, the caption text is provided "as is" without any warranty of any kind. Authors advise the user to carefully check the caption prior to its use for any purpose and re
