# Supplementary material for: Identification of Cassiopea sp. in Lake Macquarie, Australia and revision of the taxonomic status of Cassiopea maremetens Gershwin, Zeidler & Davie, 2010 (Cnidaria: Scyphozoa: Cassiopeidae)
Source: PeerJ. 2025 Jul 18;13:e19669. doi: 10.7717/peerj.19669 (PMC12278942; doi:10.7717/peerj.19669)
Supplement: Supplemental Information 5 [file peerj-13-19669-s005.xlsx]

## Sheet: MatrixOutput
	C_ndrosia_Lake_Illawarra_Australia	C_sp_Port_Hacking_Australia	C_sp_Papua	C_ornata_California	C_andromeda_Japan	C_ornata_Singapore	C_andromeda_Angas_Inlet_Australia	C_andromeda_Israel	Lake_Macquarie_Australia	C_sp_Lizard_Island_Australia	Wallis_Lake_Australia	Pelican_Waters_Australia	C_sp3_Coombabah_Creek_Australia_1	C_sp_3_Oahu_Hawaii_1	C_sp_3_Oahu_Hawaii_2	C_sp3_Oahu_Hawaii_3	C_sp3_Oahu_Hawaii_4	C_andromeda_Oahu_Hawaii	C_andromeda_Molokai_Hawaii_1	C_andromeda_Molokai_Hawaii_2	C_ornata_Palau_1	C_ornata_Palau_2	C_ornata_Fiji	C_sp2_Observation_Point_PNG_1	C_sp2_Observation_Point_PNG_2	C_sp3_Emona_PNG_1	C_sp_3_Emona_PNG_2	C_andromeda_Egypt	C_sp1_Port_Douglas_Australia	C_ornata_Indonesia	C_frondosa_Panama_1	C_frondosa_Panama_2	C_frondosa_Florida_Keys	C_andromeda_Florida_Keys	C_andromeda_Walsingham_Pond_Bermuda_1	C_andromeda_Walsingham_Pond_Bermuda_2	C_andromeda_Richardson_Bay_Bermuda_1	C_andromeda_Richardson_Bay_Bermuda_2	C_ornata_Palau_3	C_ornata_Palau_4	C_ornata_Palau_5	C_ornata_Palau_6	C_ornata_Palau_7	C_ornata_Palau_8	C_ornata_Palau_9	C_ornata_Palau_10	C_ornata_Palau_11	C_andromeda_Palau	C_sp4_Palau_1
C_ndrosia_Lake_Illawarra_Australia
C_sp_Port_Hacking_Australia	0
C_sp_Papua	0.164885	0.164885
C_ornata_California	0.138211	0.138211	0.15122
C_andromeda_Japan	0.158576	0.167987	0.0436893	0.142149
C_ornata_Singapore	0.171733	0.171733	0.164885	0.118699	0.152104
C_andromeda_Angas_Inlet_Australia	0.164134	0.164134	0.172519	0.15122	0.156958	0.153495
C_andromeda_Israel	0.164134	0.164134	0.172519	0.15122	0.156958	0.153495	0
Lake_Macquarie_Australia	0.156535	0.156535	0.167939	0.15935	0.156958	0.165653	0.0638298	0.0638298
C_sp_Lizard_Island_Australia	0.161094	0.161094	0.120611	0.156098	0.121359	0.165653	0.170213	0.170213	0.170213
Wallis_Lake_Australia	0.156535	0.156535	0.167939	0.15935	0.156958	0.165653	0.0638298	0.0638298	0	0.170213
Pelican_Waters_Australia	0.156535	0.156535	0.167939	0.15935	0.156958	0.165653	0.0638298	0.0638298	0	0.170213	0
C_sp3_Coombabah_Creek_Australia_1	0.00489396	0.00489396	0.167213	0.145798	0.160558	0.176183	0.164763	0.164763	0.158238	0.159869	0.158238	0.158238
C_sp_3_Oahu_Hawaii_1	0.0439024	0.0439024	0.157724	0.144715	0.152066	0.16748	0.157724	0.157724	0.157724	0.15935	0.157724	0.157724	0.0463122
C_sp_3_Oahu_Hawaii_2	0.0439024	0.0439024	0.157724	0.144715	0.152066	0.16748	0.157724	0.157724	0.157724	0.15935	0.157724	0.157724	0.0463122	0
C_sp3_Oahu_Hawaii_3	0.0422764	0.0422764	0.15935	0.146341	0.152066	0.169106	0.15935	0.15935	0.15935	0.160976	0.15935	0.15935	0.0445969	0.00162602	0.00162602
C_sp3_Oahu_Hawaii_4	0.0439024	0.0439024	0.157724	0.144715	0.152066	0.16748	0.157724	0.157724	0.157724	0.15935	0.157724	0.157724	0.0463122	0	0	0.00162602
C_andromeda_Oahu_Hawaii	0.179969	0.179969	0.190923	0.16145	0.17686	0.173709	0.0219092	0.0219092	0.086072	0.187793	0.086072	0.086072	0.16804	0.16804	0.16804	0.169687	0.16804
C_andromeda_Molokai_Hawaii_1	0.165854	0.165854	0.172358	0.157724	0.160331	0.165854	0.00813008	0.00813008	0.0747967	0.178862	0.0747967	0.0747967	0.171527	0.164228	0.164228	0.165854	0.164228	0.0247117
C_andromeda_Molokai_Hawaii_2	0.169106	0.169106	0.17561	0.160976	0.166942	0.16748	0.0130081	0.0130081	0.0796748	0.180488	0.0796748	0.0796748	0.174957	0.16748	0.16748	0.169106	0.16748	0.029654	0.0146341
C_ornata_Palau_1	0.173984	0.173984	0.170732	0.128455	0.158678	0.0341463	0.170732	0.170732	0.17561	0.177236	0.17561	0.17561	0.178388	0.172358	0.172358	0.173984	0.172358	0.182867	0.178862	0.180488
C_ornata_Palau_2	0.170732	0.170732	0.170732	0.128455	0.158678	0.0341463	0.16748	0.16748	0.172358	0.177236	0.172358	0.172358	0.174957	0.169106	0.169106	0.170732	0.169106	0.179572	0.17561	0.177236	0.00650407
C_ornata_Fiji	0.170732	0.170732	0.165854	0.125203	0.155372	0.0276423	0.16748	0.16748	0.172358	0.170732	0.172358	0.172358	0.174957	0.169106	0.169106	0.170732	0.169106	0.179572	0.17561	0.177236	0.00650407	0.00650407
C_sp2_Observation_Point_PNG_1	0.151466	0.151466	0.114007	0.148208	0.112583	0.175896	0.167752	0.167752	0.167752	0.0390879	0.167752	0.167752	0.154374	0.153094	0.153094	0.154723	0.153094	0.178218	0.175896	0.177524	0.177524	0.177524	0.17101
C_sp2_Observation_Point_PNG_2	0.154723	0.154723	0.117264	0.154723	0.115894	0.167752	0.169381	0.169381	0.17101	0.00488599	0.17101	0.17101	0.156357	0.161238	0.161238	0.162866	0.161238	0.179868	0.177524	0.179153	0.179153	0.179153	0.172638	0.040783
C_sp3_Emona_PNG_1	0.0373984	0.0373984	0.15935	0.15122	0.152066	0.172358	0.164228	0.164228	0.160976	0.164228	0.160976	0.160976	0.0394511	0.0130081	0.0130081	0.0113821	0.0130081	0.174629	0.170732	0.173984	0.177236	0.173984	0.173984	0.15798	0.166124
C_sp_3_Emona_PNG_2	0.0373984	0.0373984	0.15935	0.15122	0.152066	0.172358	0.164228	0.164228	0.160976	0.164228	0.160976	0.160976	0.0394511	0.0130081	0.0130081	0.0113821	0.0130081	0.174629	0.170732	0.173984	0.177236	0.173984	0.173984	0.15798	0.166124	0
C_andromeda_Egypt	0.156098	0.156098	0.164228	0.152846	0.153719	0.157724	0.00487805	0.00487805	0.0682927	0.169106	0.0682927	0.0682927	0.161235	0.156098	0.156098	0.157724	0.156098	0.0214168	0.0130081	0.0178862	0.172358	0.169106	0.16748	0.169381	0.167752	0.162602	0.162602
C_sp1_Port_Douglas_Australia	0.169106	0.169106	0.156098	0.113821	0.143802	0.0796748	0.162602	0.162602	0.16748	0.162602	0.16748	0.16748	0.174957	0.172358	0.172358	0.173984	0.172358	0.172982	0.170732	0.172358	0.099187	0.099187	0.0926829	0.164495	0.164495	0.17561	0.17561	0.165854
C_ornata_Indonesia	0.180488	0.180488	0.165854	0.123577	0.155372	0.0341463	0.16748	0.16748	0.17561	0.173984	0.17561	0.17561	0.188679	0.17561	0.17561	0.177236	0.17561	0.179572	0.172358	0.173984	0.0373984	0.0390244	0.0325203	0.177524	0.172638	0.180488	0.180488	0.16748	0.0926829
C_frondosa_Panama_1	0.171289	0.171289	0.187602	0.169657	0.174129	0.184339	0.176183	0.176183	0.189233	0.179445	0.189233	0.189233	0.173242	0.174551	0.174551	0.176183	0.174551	0.190083	0.182708	0.185971	0.199021	0.199021	0.192496	0.17292	0.178105	0.171289	0.171289	0.174551	0.177814	0.187602
C_frondosa_Panama_2	0.16748	0.16748	0.186992	0.165854	0.173554	0.18374	0.173984	0.173984	0.186992	0.17561	0.186992	0.186992	0.171527	0.170732	0.170732	0.172358	0.170732	0.186161	0.180488	0.18374	0.198374	0.198374	0.19187	0.169381	0.174267	0.16748	0.16748	0.172358	0.177236	0.186992	0.00326264
C_frondosa_Florida_Keys	0.16748	0.16748	0.190244	0.16748	0.17686	0.185366	0.178862	0.178862	0.19187	0.182114	0.19187	0.19187	0.171527	0.16748	0.16748	0.169106	0.16748	0.191104	0.185366	0.188618	0.196748	0.196748	0.190244	0.175896	0.180782	0.164228	0.164228	0.177236	0.178862	0.188618	0.0195759	0.0195122
C_andromeda_Florida_Keys	0.160976	0.160976	0.169106	0.154472	0.158678	0.160976	0.00487805	0.00487805	0.0715447	0.173984	0.0715447	0.0715447	0.166381	0.15935	0.15935	0.160976	0.15935	0.0214168	0.0097561	0.0130081	0.173984	0.170732	0.170732	0.17101	0.172638	0.165854	0.165854	0.0097561	0.165854	0.169106	0.179445	0.177236	0.182114
C_andromeda_Walsingham_Pond_Bermuda_1	0.157724	0.157724	0.165854	0.15122	0.155372	0.157724	0	0	0.0666667	0.170732	0.0666667	0.0666667	0.16295	0.157724	0.157724	0.15935	0.157724	0.0164745	0.00813008	0.0130081	0.170732	0.16748	0.16748	0.167752	0.169381	0.164228	0.164228	0.00487805	0.162602	0.16748	0.176183	0.173984	0.178862	0.00487805
C_andromeda_Walsingham_Pond_Bermuda_2	0.16748	0.16748	0.17561	0.164228	0.161983	0.16748	0.0146341	0.0146341	0.0813008	0.182114	0.0813008	0.0813008	0.173242	0.165854	0.165854	0.16748	0.165854	0.0313015	0.0113821	0.0162602	0.182114	0.178862	0.177236	0.179153	0.180782	0.172358	0.172358	0.0162602	0.172358	0.173984	0.184339	0.182114	0.188618	0.0162602	0.0146341
C_andromeda_Richardson_Bay_Bermuda_1	0.15935	0.15935	0.16748	0.152846	0.157025	0.15935	0.00162602	0.00162602	0.0682927	0.172358	0.0682927	0.0682927	0.164666	0.15935	0.15935	0.160976	0.15935	0.0181219	0.0097561	0.0146341	0.172358	0.169106	0.169106	0.169381	0.17101	0.165854	0.165854	0.00650407	0.164228	0.169106	0.177814	0.17561	0.180488	0.00650407	0.00162602	0.0162602
C_andromeda_Richardson_Bay_Bermuda_2	0.162866	0.162866	0.172638	0.159609	0.162252	0.162866	0.00977199	0.00977199	0.0765472	0.177524	0.0765472	0.0765472	0.166381	0.161238	0.161238	0.162866	0.161238	0.0264026	0.0114007	0.0162866	0.177524	0.174267	0.172638	0.174551	0.176183	0.167752	0.167752	0.0114007	0.167752	0.169381	0.181373	0.179153	0.184039	0.0114007	0.00977199	0.0162866	0.0114007
C_ornata_Palau_3	0.173759	0.290588	0.166667	0.123412	0.159445	0.0301418	0.164894	0.164894	0.170213	0.175532	0.170213	0.170213	0.175337	0.170599	0.170599	0.170599	0.170599	0.186933	0.172414	0.177858	0.00362976	0	0	0.176364	0.178182	0.174229	0.174229	0.165154	0.092559	0.0344828	0.189435	0.188748	0.185118	0.170599	0.166969	0.174229	0.166969	0.172727
C_ornata_Palau_4	0.173759	0.289412	0.166667	0.123412	0.159445	0.0301418	0.164894	0.164894	0.170213	0.175532	0.170213	0.170213	0.175337	0.170599	0.170599	0.170599	0.170599	0.186933	0.172414	0.177858	0.00362976	0	0	0.176364	0.178182	0.174229	0.174229	0.165154	0.092559	0.0344828	0.189435	0.188748	0.185118	0.170599	0.166969	0.174229	0.166969	0.172727	0.00117647
C_ornata_Palau_5	0.173759	0.290588	0.166667	0.123412	0.159445	0.0301418	0.164894	0.164894	0.170213	0.175532	0.170213	0.170213	0.175337	0.170599	0.170599	0.170599	0.170599	0.186933	0.172414	0.177858	0.00362976	0	0	0.176364	0.178182	0.174229	0.174229	0.165154	0.092559	0.0344828	0.189435	0.188748	0.185118	0.170599	0.166969	0.174229	0.166969	0.172727	0.00235294	0.00117647
C_ornata_Palau_6	0.175532	0.290588	0.164894	0.125227	0.157712	0.0319149	0.166667	0.166667	0.171986	0.177305	0.171986	0.171986	0.177264	0.172414	0.172414	0.172414	0.172414	0.188748	0.174229	0.179673	0.00544465	0.00181488	0.00181488	0.178182	0.18	0.176044	0.176044	0.166969	0.0943739	0.0362976	0.191257	0.190563	0.186933	0.172414	0.168784	0.176044	0.168784	0.174545	0.00235294	0.00117647	0.00235294
C_ornata_Palau_7	0.171986	0.285714	0.164894	0.121597	0.157712	0.0283688	0.163121	0.163121	0.16844	0.173759	0.16844	0.16844	0.17341	0.168784	0.168784	0.168784	0.168784	0.185118	0.170599	0.176044	0.00544465	0.00181488	0.00181488	0.174545	0.176364	0.172414	0.172414	0.163339	0.0943739	0.0362976	0.187614	0.186933	0.183303	0.168784	0.165154	0.172414	0.165154	0.170909	0.00238095	0.00119048	0.00238095	0.00238095
C_ornata_Palau_8	0.171986	0.288235	0.164894	0.121597	0.157712	0.0283688	0.163121	0.163121	0.16844	0.173759	0.16844	0.16844	0.175337	0.168784	0.168784	0.168784	0.168784	0.185118	0.170599	0.176044	0.00544465	0.00181488	0.00181488	0.174545	0.176364	0.172414	0.172414	0.163339	0.0907441	0.0326679	0.187614	0.186933	0.183303	0.168784	0.165154	0.172414	0.165154	0.170909	0.00235294	0.00117647	0.00235294	0.00235294	0.00238095
C_ornata_Palau_9	0.173759	0.290588	0.166667	0.123412	0.159445	0.0301418	0.164894	0.164894	0.170213	0.175532	0.170213	0.170213	0.175337	0.170599	0.170599	0.170599	0.170599	0.186933	0.172414	0.177858	0.00362976	0	0	0.176364	0.178182	0.174229	0.174229	0.165154	0.092559	0.0344828	0.189435	0.188748	0.185118	0.170599	0.166969	0.174229	0.166969	0.172727	0.00235294	0.00117647	0.00235294	0.00235294	0.00238095	0.00235294
C_ornata_Palau_10	0.173759	0.291765	0.166667	0.123412	0.159445	0.0301418	0.164894	0.164894	0.170213	0.175532	0.170213	0.170213	0.175337	0.170599	0.170599	0.170599	0.170599	0.186933	0.172414	0.177858	0.00362976	0	0	0.176364	0.178182	0.174229	0.174229	0.165154	0.092559	0.0344828	0.189435	0.188748	0.185118	0.170599	0.166969	0.174229	0.166969	0.172727	0.00588235	0.00470588	0.00588235	0.00588235	0.0047619	0.00588235	0.00588235
C_ornata_Palau_11	0.175532	0.290588	0.16844	0.125227	0.161179	0.0319149	0.166667	0.166667	0.171986	0.177305	0.171986	0.171986	0.177264	0.172414	0.172414	0.172414	0.172414	0.188748	0.174229	0.179673	0.00544465	0.00181488	0.00181488	0.178182	0.18	0.176044	0.176044	0.166969	0.0943739	0.0362976	0.191257	0.190563	0.186933	0.172414	0.168784	0.176044	0.168784	0.174545	0.00235294	0.00117647	0.00235294	0.00235294	0.00238095	0.00235294	0.00235294	0.00588235
C_andromeda_Palau	0.159574	0.292941	0.163121	0.161525	0.162912	0.170213	0.0762411	0.0762411	0.0070922	0.171986	0.0070922	0.0070922	0.16185	0.165154	0.165154	0.165154	0.165154	0.101633	0.0816697	0.0907441	0.176044	0.172414	0.172414	0.170909	0.174545	0.166969	0.166969	0.0744102	0.168784	0.177858	0.191257	0.188748	0.196007	0.0816697	0.076225	0.0852995	0.076225	0.0854545	0.158824	0.157647	0.158824	0.158824	0.155952	0.156471	0.158824	0.157647	0.158824
C_sp4_Palau_1	0.140071	0.267059	0.14539	0.0653358	0.138648	0.125887	0.147163	0.147163	0.156028	0.148936	0.156028	0.156028	0.142582	0.136116	0.136116	0.136116	0.136116	0.166969	0.15245	0.157895	0.141561	0.137931	0.137931	0.149091	0.149091	0.134301	0.134301	0.14882	0.117967	0.130672	0.169399	0.165154	0.165154	0.154265	0.150635	0.15608	0.150635	0.156364	0.112941	0.111765	0.112941	0.112941	0.111905	0.110588	0.112941	0.115294	0.112941	0.152941
C_sp4_Palau_2	0.140071	0.265882	0.14539	0.0653358	0.138648	0.125887	0.147163	0.147163	0.156028	0.148936	0.156028	0.156028	0.142582	0.136116	0.136116	0.136116	0.136116	0.166969	0.15245	0.157895	0.141561	0.137931	0.137931	0.149091	0.149091	0.134301	0.134301	0.14882	0.117967	0.130672	0.169399	0.165154	0.165154	0.154265	0.150635	0.15608	0.150635	0.156364	0.116471	0.115294	0.116471	0.116471	0.114286	0.114118	0.116471	0.118824	0.116471	0.155294	0.00352941
C_sp4_Palau_3	0.140071	0.264706	0.14539	0.0653358	0.140381	0.125887	0.147163	0.147163	0.156028	0.148936	0.156028	0.156028	0.142582	0.136116	0.136116	0.136116	0.136116	0.166969	0.15245	0.157895	0.141561	0.137931	0.137931	0.149091	0.149091	0.134301	0.134301	0.14882	0.117967	0.130672	0.169399	0.165154	0.165154	0.154265	0.150635	0.15608	0.150635	0.156364	0.12	0.118824	0.12	0.12	0.116667	0.117647	0.12	0.121176	0.12	0.156471	0.00941176
C_sp4_Palau_4	0.141844	0.269412	0.14539	0.0671506	0.138648	0.125887	0.147163	0.147163	0.156028	0.148936	0.156028	0.156028	0.144509	0.137931	0.137931	0.137931	0.137931	0.166969	0.15245	0.157895	0.141561	0.137931	0.137931	0.149091	0.149091	0.136116	0.136116	0.14882	0.117967	0.130672	0.17122	0.166969	0.166969	0.154265	0.150635	0.15608	0.150635	0.156364	0.129412	0.128235	0.129412	0.129412	0.12619	0.127059	0.129412	0.130588	0.129412	0.16	0.0176471
C_sp4_Palau_5	0.140071	0.268235	0.14539	0.0653358	0.138648	0.125887	0.147163	0.147163	0.156028	0.148936	0.156028	0.156028	0.142582	0.136116	0.136116	0.136116	0.136116	0.166969	0.15245	0.157895	0.141561	0.137931	0.137931	0.149091	0.149091	0.134301	0.134301	0.14882	0.117967	0.130672	0.169399	0.165154	0.165154	0.154265	0.150635	0.15608	0.150635	0.156364	0.129412	0.128235	0.129412	0.129412	0.12619	0.127059	0.129412	0.130588	0.129412	0.16	0.0164706
C_sp4_Palau_6	0.141844	0.268235	0.143617	0.0671506	0.136915	0.124113	0.14539	0.14539	0.154255	0.147163	0.154255	0.154255	0.144509	0.137931	0.137931	0.137931	0.137931	0.165154	0.150635	0.15608	0.139746	0.136116	0.136116	0.147273	0.147273	0.136116	0.136116	0.147005	0.116152	0.128857	0.17122	0.166969	0.166969	0.15245	0.14882	0.154265	0.14882	0.154545	0.127059	0.125882	0.127059	0.127059	0.12381	0.124706	0.127059	0.128235	0.127059	0.157647	0.0164706
C_sp4_Palau_7	0.140071	0.267059	0.14539	0.0653358	0.138648	0.125887	0.147163	0.147163	0.156028	0.148936	0.156028	0.156028	0.142582	0.136116	0.136116	0.136116	0.136116	0.166969	0.15245	0.157895	0.141561	0.137931	0.137931	0.149091	0.149091	0.134301	0.134301	0.14882	0.117967	0.130672	0.169399	0.165154	0.165154	0.154265	0.150635	0.15608	0.150635	0.156364	0.128235	0.127059	0.128235	0.128235	0.125	0.125882	0.128235	0.129412	0.128235	0.158824	0.0152941
C_sp4_Palau_8	0.140071	0.267059	0.147163	0.0689655	0.136915	0.118794	0.143617	0.143617	0.156028	0.148936	0.156028	0.156028	0.142582	0.136116	0.136116	0.136116	0.136116	0.163339	0.150635	0.15608	0.134301	0.130672	0.130672	0.149091	0.149091	0.134301	0.134301	0.145191	0.117967	0.123412	0.169399	0.165154	0.165154	0.150635	0.147005	0.15245	0.147005	0.152727	0.123529	0.122353	0.123529	0.123529	0.120238	0.121176	0.123529	0.124706	0.123529	0.158824	0.02
C_sp4_Palau_9	0.147163	0.271765	0.14539	0.0725953	0.138648	0.12234	0.14539	0.14539	0.154255	0.148936	0.154255	0.154255	0.148362	0.143376	0.143376	0.143376	0.143376	0.165154	0.150635	0.15608	0.134301	0.130672	0.130672	0.149091	0.149091	0.141561	0.141561	0.147005	0.117967	0.127042	0.17122	0.166969	0.166969	0.15245	0.14882	0.154265	0.14882	0.154545	0.122353	0.121176	0.122353	0.122353	0.119048	0.12	0.122353	0.123529	0.122353	0.158824	0.0211765
C_sp4_Palau_10	0.141844	0.269412	0.147163	0.0671506	0.140381	0.12766	0.148936	0.148936	0.157801	0.150709	0.157801	0.157801	0.144509	0.137931	0.137931	0.137931	0.137931	0.168784	0.154265	0.15971	0.143376	0.139746	0.139746	0.150909	0.150909	0.136116	0.136116	0.150635	0.119782	0.132486	0.17122	0.166969	0.166969	0.15608	0.15245	0.157895	0.15245	0.158182	0.130588	0.129412	0.130588	0.130588	0.127381	0.128235	0.130588	0.131765	0.130588	0.161176	0.0176471
C_sp4_Palau_11	0.141844	0.269412	0.147163	0.0671506	0.140381	0.12766	0.148936	0.148936	0.157801	0.150709	0.157801	0.157801	0.144509	0.137931	0.137931	0.137931	0.137931	0.168784	0.154265	0.15971	0.143376	0.139746	0.139746	0.150909	0.150909	0.136116	0.136116	0.150635	0.119782	0.132486	0.17122	0.166969	0.166969	0.15608	0.15245	0.157895	0.15245	0.158182	0.130588	0.129412	0.130588	0.130588	0.127381	0.128235	0.130588	0.131765	0.130588	0.161176	0.0176471
C_sp4_Palau_12	0.143617	0.270588	0.14539	0.0689655	0.138648	0.125887	0.147163	0.147163	0.156028	0.148936	0.156028	0.156028	0.146435	0.139746	0.139746	0.139746	0.139746	0.166969	0.15245	0.157895	0.141561	0.137931	0.137931	0.149091	0.149091	0.137931	0.137931	0.14882	0.117967	0.130672	0.173042	0.168784	0.168784	0.154265	0.150635	0.15608	0.150635	0.156364	0.129412	0.128235	0.129412	0.129412	0.12619	0.127059	0.129412	0.130588	0.129412	0.16	0.0188235
C_sp4_Palau_13	0.140071	0.267059	0.14539	0.0653358	0.138648	0.125887	0.147163	0.147163	0.156028	0.148936	0.156028	0.156028	0.142582	0.136116	0.136116	0.136116	0.136116	0.166969	0.15245	0.157895	0.141561	0.137931	0.137931	0.149091	0.149091	0.134301	0.134301	0.14882	0.117967	0.130672	0.169399	0.165154	0.165154	0.154265	0.150635	0.15608	0.150635	0.156364	0.129412	0.128235	0.129412	0.129412	0.12619	0.127059	0.129412	0.130588	0.129412	0.158824	0.0164706
C_sp4_Palau_14	0.140071	0.268235	0.14539	0.0653358	0.138648	0.125887	0.147163	0.147163	0.156028	0.148936	0.156028	0.156028	0.142582	0.136116	0.136116	0.136116	0.136116	0.166969	0.15245	0.157895	0.141561	0.137931	0.137931	0.149091	0.149091	0.134301	0.134301	0.14882	0.117967	0.130672	0.169399	0.165154	0.165154	0.154265	0.150635	0.15608	0.150635	0.156364	0.130588	0.129412	0.130588	0.130588	0.127381	0.128235	0.130588	0.131765	0.130588	0.16	0.0176471
C_sp4_Palau_15	0.141844	0.268235	0.147163	0.0671506	0.142114	0.12766	0.148936	0.148936	0.157801	0.150709	0.157801	0.157801	0.144509	0.137931	0.137931	0.137931	0.137931	0.168784	0.154265	0.15971	0.143376	0.139746	0.139746	0.150909	0.150909	0.136116	0.136116	0.150635	0.119782	0.132486	0.17122	0.166969	0.166969	0.15608	0.15245	0.157895	0.15245	0.158182	0.117647	0.116471	0.117647	0.117647	0.114286	0.115294	0.117647	0.116471	0.117647	0.154118	0.0223529
C_sp6_Palau	0.156028	0.288235	0.108156	0.134301	0.102253	0.14539	0.179078	0.179078	0.171986	0.118794	0.171986	0.171986	0.152216	0.161525	0.161525	0.161525	0.161525	0.197822	0.185118	0.192377	0.15608	0.15245	0.15245	0.123636	0.118182	0.165154	0.165154	0.177858	0.143376	0.157895	0.180328	0.179673	0.183303	0.183303	0.179673	0.186933	0.179673	0.187273	0.150588	0.149412	0.150588	0.150588	0.14881	0.150588	0.150588	0.144706	0.150588	0.165882	0.137647
C_andromeda_Brazil_1	0.169231	0.257718	0.169231	0.167832	0.167224	0.164103	0.0102564	0.0102564	0.0769231	0.181197	0.0769231	0.0769231	0.17037	0.166084	0.166084	0.166084	0.166084	0.034965	0.0157343	0.0244755	0.18007	0.176573	0.176573	0.180385	0.182137	0.171329	0.171329	0.0104895	0.174825	0.178322	0.189474	0.187063	0.194056	0.0157343	0.0104895	0.0192308	0.0122378	0.0192644	0.168508	0.167127	0.168508	0.168508	0.165746	0.165746	0.168508	0.168508	0.168508	0.0801105	0.153315
C_andromeda_Mexico	0.154412	0.154412	0.159926	0.150735	0.15625	0.15625	0.00551471	0.00551471	0.0716912	0.178309	0.0716912	0.0716912	0.158088	0.154412	0.154412	0.154412	0.154412	0.00919118	0.0110294	0.0202206	0.169118	0.165441	0.165441	0.172794	0.176796	0.159926	0.159926	0.00919118	0.161765	0.169118	0.183824	0.181985	0.181985	0.0110294	0.00551471	0.0147059	0.00735294	0.0110294	0.167323	0.167323	0.167323	0.169291	0.165354	0.167323	0.167323	0.167323	0.169291	0.0826772	0.143701
C_xamachana_Panama_1	0.167279	0.167279	0.185662	0.180147	0.178309	0.185662	0.181985	0.181985	0.1875	0.1875	0.1875	0.1875	0.165441	0.170956	0.170956	0.170956	0.170956	0.185662	0.185662	0.193015	0.1875	0.1875	0.183824	0.183824	0.186004	0.165441	0.165441	0.180147	0.185662	0.1875	0.0183824	0.0202206	0.0110294	0.185662	0.181985	0.1875	0.183824	0.185662	0.179134	0.179134	0.179134	0.181102	0.177165	0.179134	0.179134	0.179134	0.181102	0.190945	0.167323
C_frondosa_Panama_3	0.145221	0.145221	0.15625	0.159926	0.150735	0.169118	0.0680147	0.0680147	0.00183824	0.169118	0.00183824	0.00183824	0.148897	0.152574	0.152574	0.152574	0.152574	0.0716912	0.0735294	0.0827206	0.174632	0.170956	0.170956	0.165441	0.171271	0.154412	0.154412	0.0680147	0.167279	0.178309	0.1875	0.185662	0.193015	0.0735294	0.0680147	0.0772059	0.0698529	0.0735294	0.17126	0.17126	0.17126	0.173228	0.169291	0.17126	0.17126	0.17126	0.173228	0.00984252	0.159449
C_xamachana_Northwest_Pacific_Ocean	0.158055	0.158055	0.169466	0.160976	0.15534	0.164134	0.06231	0.06231	0.00151976	0.171733	0.00151976	0.00151976	0.159869	0.15935	0.15935	0.160976	0.15935	0.084507	0.0731707	0.0780488	0.173984	0.170732	0.170732	0.169381	0.172638	0.162602	0.162602	0.0666667	0.169106	0.173984	0.189233	0.186992	0.19187	0.0699187	0.0650407	0.0796748	0.0666667	0.0749186	0.16844	0.16844	0.16844	0.170213	0.166667	0.166667	0.16844	0.16844	0.170213	0.00886525	0.157801
C_andromeda_Western_Indian_Ocean	0.161094	0.161094	0.174046	0.147967	0.158576	0.156535	0.00303951	0.00303951	0.0607903	0.170213	0.0607903	0.0607903	0.161501	0.154472	0.154472	0.156098	0.154472	0.0250391	0.0113821	0.0162602	0.173984	0.170732	0.170732	0.167752	0.169381	0.160976	0.160976	0.00813008	0.162602	0.170732	0.177814	0.17561	0.177236	0.00813008	0.00325203	0.0178862	0.00487805	0.0130293	0.16844	0.16844	0.16844	0.170213	0.166667	0.166667	0.16844	0.16844	0.170213	0.072695	0.143617
C_andromeda_Brazil_2	0.155203	0.155203	0.162257	0.155203	0.15873	0.15873	0.00529101	0.00529101	0.0652557	0.178131	0.0652557	0.0652557	0.161111	0.156966	0.156966	0.156966	0.156966	0.019678	0.010582	0.0194004	0.169312	0.165785	0.165785	0.174603	0.176678	0.162257	0.162257	0.00881834	0.165785	0.169312	0.183422	0.181658	0.185185	0.010582	0.00529101	0.0141093	0.00705467	0.0141343	0.166667	0.166667	0.166667	0.168498	0.164835	0.166667	0.166667	0.166667	0.168498	0.0750916	0.148352
C_andromeda_Brazil_3	0.155203	0.155203	0.162257	0.155203	0.15873	0.15873	0.00529101	0.00529101	0.0652557	0.178131	0.0652557	0.0652557	0.161111	0.156966	0.156966	0.156966	0.156966	0.019678	0.010582	0.0194004	0.169312	0.165785	0.165785	0.174603	0.176678	0.162257	0.162257	0.00881834	0.165785	0.169312	0.183422	0.181658	0.185185	0.010582	0.00529101	0.0141093	0.00705467	0.0141343	0.166667	0.166667	0.166667	0.168498	0.164835	0.166667	0.166667	0.166667	0.168498	0.0750916	0.148352
C_andromeda_Brazil_4	0.155203	0.155203	0.162257	0.155203	0.15873	0.15873	0.00529101	0.00529101	0.0652557	0.178131	0.0652557	0.0652557	0.161111	0.156966	0.156966	0.156966	0.156966	0.019678	0.010582	0.0194004	0.169312	0.165785	0.165785	0.174603	0.176678	0.162257	0.162257	0.00881834	0.165785	0.169312	0.183422	0.181658	0.185185	0.010582	0.00529101	0.0141093	0.00705467	0.0141343	0.166667	0.166667	0.166667	0.168498	0.164835	0.166667	0.166667	0.166667	0.168498	0.0750916	0.148352
C_andromeda_Brazil_5	0.155203	0.155203	0.162257	0.155203	0.15873	0.15873	0.00529101	0.00529101	0.0652557	0.178131	0.0652557	0.0652557	0.161111	0.156966	0.156966	0.156966	0.156966	0.019678	0.010582	0.0194004	0.169312	0.165785	0.165785	0.174603	0.176678	0.162257	0.162257	0.00881834	0.165785	0.169312	0.183422	0.181658	0.185185	0.010582	0.00529101	0.0141093	0.00705467	0.0141343	0.166667	0.166667	0.166667	0.168498	0.164835	0.166667	0.166667	0.166667	0.168498	0.0750916	0.148352
C_xamachana_Brazil_1	0.15493	0.208672	0.162754	0.15935	0.160063	0.165884	0.0657277	0.0657277	0	0.170579	0	0	0.156566	0.157724	0.157724	0.15935	0.157724	0.0878594	0.0747967	0.0796748	0.17561	0.172358	0.172358	0.167752	0.17101	0.160976	0.160976	0.0682927	0.16748	0.17561	0.189233	0.186992	0.19187	0.0715447	0.0666667	0.0813008	0.0682927	0.0765472	0.168929	0.167421	0.168929	0.168929	0.165913	0.165913	0.168929	0.167421	0.168929	0.00603318	0.155354
C_xamachana_Brazil_2	0.156958	0.211994	0.165049	0.165289	0.164818	0.169903	0.0679612	0.0679612	0.012945	0.173139	0.012945	0.012945	0.155323	0.158678	0.158678	0.158678	0.158678	0.0909091	0.0727273	0.0809917	0.180165	0.17686	0.17686	0.172185	0.173841	0.160331	0.160331	0.0677686	0.168595	0.178512	0.189055	0.186777	0.193388	0.0727273	0.0677686	0.0760331	0.0694215	0.0761589	0.173454	0.171946	0.173454	0.173454	0.170437	0.170437	0.173454	0.171946	0.173454	0.0180995	0.158371
C_xamachana_unknown_location	0.153565	0.153565	0.160878	0.160878	0.150278	0.162706	0.0694698	0.0694698	0.00182815	0.162706	0.00182815	0.00182815	0.157221	0.157221	0.157221	0.159049	0.157221	0.0731261	0.0786106	0.0840951	0.173675	0.170018	0.16819	0.162706	0.164835	0.160878	0.160878	0.0694698	0.16819	0.175503	0.195612	0.193784	0.195612	0.0749543	0.0694698	0.0840951	0.071298	0.0749543	0.16701	0.16701	0.16701	0.169072	0.164948	0.16701	0.16701	0.16701	0.169072	0.0103093	0.158763
C_xamachana_Oahu_Hawaii_1	0.156535	0.156535	0.167939	0.15935	0.156958	0.165653	0.0638298	0.0638298	0	0.170213	0	0	0.158238	0.157724	0.157724	0.15935	0.157724	0.086072	0.0747967	0.0796748	0.17561	0.172358	0.172358	0.167752	0.17101	0.160976	0.160976	0.0682927	0.16748	0.17561	0.189233	0.186992	0.19187	0.0715447	0.0666667	0.0813008	0.0682927	0.0765472	0.170213	0.170213	0.170213	0.171986	0.16844	0.16844	0.170213	0.170213	0.171986	0.0070922	0.156028
C_xamachana_Oahu_Hawaii_2	0.156535	0.156535	0.167939	0.15935	0.156958	0.165653	0.0638298	0.0638298	0	0.170213	0	0	0.158238	0.157724	0.157724	0.15935	0.157724	0.086072	0.0747967	0.0796748	0.17561	0.172358	0.172358	0.167752	0.17101	0.160976	0.160976	0.0682927	0.16748	0.17561	0.189233	0.186992	0.19187	0.0715447	0.0666667	0.0813008	0.0682927	0.0765472	0.170213	0.170213	0.170213	0.171986	0.16844	0.16844	0.170213	0.170213	0.171986	0.0070922	0.156028
C_xamachana_Oahu_Hawaii_3	0.156535	0.156535	0.167939	0.15935	0.156958	0.165653	0.0638298	0.0638298	0	0.170213	0	0	0.158238	0.157724	0.157724	0.15935	0.157724	0.086072	0.0747967	0.0796748	0.17561	0.172358	0.172358	0.167752	0.17101	0.160976	0.160976	0.0682927	0.16748	0.17561	0.189233	0.186992	0.19187	0.0715447	0.0666667	0.0813008	0.0682927	0.0765472	0.170213	0.170213	0.170213	0.171986	0.16844	0.16844	0.170213	0.170213	0.171986	0.0070922	0.156028
C_xamachana_Panama_2	0.169118	0.169118	0.1875	0.181985	0.180147	0.1875	0.183824	0.183824	0.189338	0.189338	0.189338	0.189338	0.167279	0.172794	0.172794	0.172794	0.172794	0.1875	0.1875	0.194853	0.189338	0.189338	0.185662	0.185662	0.187845	0.167279	0.167279	0.181985	0.1875	0.189338	0.0202206	0.0220588	0.0128676	0.1875	0.183824	0.189338	0.185662	0.1875	0.181102	0.181102	0.181102	0.183071	0.179134	0.181102	0.181102	0.181102	0.183071	0.192913	0.169291
C_xamachana_Panama_3	0.167279	0.167279	0.185662	0.180147	0.178309	0.185662	0.181985	0.181985	0.1875	0.1875	0.1875	0.1875	0.165441	0.170956	0.170956	0.170956	0.170956	0.185662	0.185662	0.193015	0.1875	0.1875	0.183824	0.183824	0.186004	0.165441	0.165441	0.180147	0.185662	0.1875	0.0183824	0.0202206	0.0110294	0.185662	0.181985	0.1875	0.183824	0.185662	0.179134	0.179134	0.179134	0.181102	0.177165	0.179134	0.179134	0.179134	0.181102	0.190945	0.167323
C_sp3_Lake_Alexander_Australia_1	0.0381679	0.0381679	0.164885	0.149593	0.160194	0.174046	0.160305	0.160305	0.164885	0.149618	0.164885	0.164885	0.0327869	0.0585366	0.0585366	0.0569106	0.0585366	0.173709	0.164228	0.16748	0.177236	0.173984	0.172358	0.138436	0.144951	0.0552846	0.0552846	0.154472	0.17561	0.17561	0.177814	0.173984	0.177236	0.15935	0.156098	0.165854	0.157724	0.161238	0.173759	0.173759	0.173759	0.175532	0.171986	0.175532	0.173759	0.173759	0.175532	0.170213	0.140071
C_sp3_Lake_Alexander_Australia_2	0.0311927	0.0311927	0.148624	0.148624	0.161468	0.170642	0.150459	0.150459	0.148624	0.144954	0.148624	0.148624	0.0311927	0.0587156	0.0587156	0.0587156	0.0587156	0.154128	0.155963	0.163303	0.176147	0.172477	0.172477	0.137615	0.143382	0.053211	0.053211	0.150459	0.170642	0.174312	0.174312	0.172477	0.177982	0.154128	0.150459	0.157798	0.152294	0.155963	0.175197	0.175197	0.175197	0.177165	0.173228	0.175197	0.175197	0.175197	0.177165	0.161417	0.135827
C_sp3_Lake_Alexander_Australia_3	0.0366412	0.0366412	0.166412	0.15122	0.161812	0.175573	0.161832	0.161832	0.163359	0.151145	0.163359	0.163359	0.0311475	0.0601626	0.0601626	0.0585366	0.0601626	0.175274	0.165854	0.169106	0.178862	0.17561	0.173984	0.140065	0.14658	0.0536585	0.0536585	0.156098	0.177236	0.177236	0.177814	0.173984	0.177236	0.160976	0.157724	0.16748	0.15935	0.162866	0.175532	0.175532	0.175532	0.177305	0.173759	0.177305	0.175532	0.175532	0.177305	0.16844	0.141844
C_sp3_Coombabah_Creek_Australia_2	0.00610687	0.00610687	0.163359	0.141463	0.156958	0.177099	0.164885	0.164885	0.160305	0.160305	0.160305	0.160305	0.00655738	0.0504065	0.0504065	0.0487805	0.0504065	0.183099	0.165854	0.169106	0.178862	0.17561	0.17561	0.149837	0.153094	0.0439024	0.0439024	0.156098	0.173984	0.185366	0.168026	0.164228	0.164228	0.160976	0.157724	0.16748	0.15935	0.162866	0.179078	0.179078	0.179078	0.180851	0.177305	0.177305	0.179078	0.179078	0.180851	0.163121	0.143617
C_sp3_Coombabah_Creek_Australia_3	0.00610687	0.00610687	0.163359	0.141463	0.156958	0.177099	0.164885	0.164885	0.160305	0.160305	0.160305	0.160305	0.00655738	0.0504065	0.0504065	0.0487805	0.0504065	0.183099	0.165854	0.169106	0.178862	0.17561	0.17561	0.149837	0.153094	0.0439024	0.0439024	0.156098	0.173984	0.185366	0.168026	0.164228	0.164228	0.160976	0.157724	0.16748	0.15935	0.162866	0.179078	0.179078	0.179078	0.180851	0.177305	0.177305	0.179078	0.179078	0.180851	0.163121	0.143617
C_sp3_Coombabah_Creek_Australia_4	0.00458015	0.00458015	0.164885	0.143089	0.158576	0.175573	0.166412	0.166412	0.158779	0.161832	0.158779	0.158779	0.00491803	0.0487805	0.0487805	0.0471545	0.0487805	0.184664	0.16748	0.170732	0.177236	0.173984	0.173984	0.151466	0.154723	0.0422764	0.0422764	0.157724	0.172358	0.18374	0.169657	0.165854	0.165854	0.162602	0.15935	0.169106	0.160976	0.164495	0.177305	0.177305	0.177305	0.179078	0.175532	0.175532	0.177305	0.177305	0.179078	0.161348	0.14539
C_sp_Indonesia	0.141985	0.141985	0.146565	0.0634146	0.135922	0.125191	0.145038	0.145038	0.154198	0.145038	0.154198	0.154198	0.144262	0.136585	0.136585	0.138211	0.136585	0.161189	0.152846	0.154472	0.141463	0.141463	0.139837	0.151466	0.148208	0.136585	0.136585	0.149593	0.120325	0.128455	0.17292	0.169106	0.16748	0.15122	0.147967	0.15935	0.149593	0.154723	0.138298	0.138298	0.138298	0.140071	0.136525	0.136525	0.138298	0.138298	0.140071	0.159574	0.00177305
C_sp3_Japan_1	0.0458716	0.0458716	0.154128	0.146789	0.155963	0.170642	0.155963	0.155963	0.150459	0.159633	0.150459	0.150459	0.0458716	0	0	0	0	0.159633	0.159633	0.166972	0.172477	0.168807	0.168807	0.154128	0.161765	0.012844	0.012844	0.155963	0.170642	0.177982	0.176147	0.174312	0.172477	0.157798	0.155963	0.161468	0.157798	0.159633	0.17126	0.17126	0.17126	0.173228	0.169291	0.17126	0.17126	0.17126	0.173228	0.163386	0.137795
C_sp3_Japan_2	0.0458716	0.0458716	0.154128	0.146789	0.155963	0.170642	0.155963	0.155963	0.150459	0.159633	0.150459	0.150459	0.0458716	0	0	0	0	0.159633	0.159633	0.166972	0.172477	0.168807	0.168807	0.154128	0.161765	0.012844	0.012844	0.155963	0.170642	0.177982	0.176147	0.174312	0.172477	0.157798	0.155963	0.161468	0.157798	0.159633	0.17126	0.17126	0.17126	0.173228	0.169291	0.17126	0.17126	0.17126	0.173228	0.163386	0.137795
C_sp3_Japan_3	0.0458716	0.0458716	0.154128	0.146789	0.155963	0.170642	0.155963	0.155963	0.150459	0.159633	0.150459	0.150459	0.0458716	0	0	0	0	0.159633	0.159633	0.166972	0.172477	0.168807	0.168807	0.154128	0.161765	0.012844	0.012844	0.155963	0.170642	0.177982	0.176147	0.174312	0.172477	0.157798	0.155963	0.161468	0.157798	0.159633	0.17126	0.17126	0.17126	0.173228	0.169291	0.17126	0.17126	0.17126	0.173228	0.163386	0.137795
C_sp_French_Polynesia	0.154128	0.154128	0.159633	0.148624	0.154128	0.154128	0.00550459	0.00550459	0.0715596	0.174312	0.0715596	0.0715596	0.154128	0.150459	0.150459	0.150459	0.150459	0.00917431	0.0110092	0.0201835	0.166972	0.163303	0.163303	0.168807	0.172794	0.155963	0.155963	0.00917431	0.159633	0.166972	0.179817	0.177982	0.177982	0.0110092	0.00550459	0.0146789	0.00733945	0.0110092	0.165354	0.165354	0.165354	0.167323	0.163386	0.165354	0.165354	0.165354	0.167323	0.0826772	0.141732
C_sp_Solomon_Islands	0.161832	0.161832	0.164885	0.115447	0.156958	0.0763359	0.149618	0.149618	0.163359	0.161832	0.163359	0.163359	0.168852	0.15935	0.15935	0.160976	0.15935	0.164319	0.15935	0.162602	0.0910569	0.0910569	0.0845528	0.159609	0.161238	0.162602	0.162602	0.152846	0.0650407	0.0845528	0.177814	0.177236	0.178862	0.154472	0.15122	0.160976	0.152846	0.15798	0.0851064	0.0851064	0.0851064	0.0868794	0.0868794	0.0833333	0.0851064	0.0851064	0.0868794	0.164894	0.124113
C_sp_Florida_Keys	0.144954	0.144954	0.155963	0.159633	0.150459	0.168807	0.0678899	0.0678899	0.00183486	0.168807	0.00183486	0.00183486	0.148624	0.152294	0.152294	0.152294	0.152294	0.0715596	0.0733945	0.0825688	0.174312	0.170642	0.170642	0.165138	0.170956	0.154128	0.154128	0.0678899	0.166972	0.177982	0.187156	0.185321	0.192661	0.0733945	0.0678899	0.0770642	0.0697248	0.0733945	0.17126	0.17126	0.17126	0.173228	0.169291	0.17126	0.17126	0.17126	0.173228	0.00984252	0.159449
Catostylus_mosaicus	0.20098	0.20098	0.223317	0.216495	0.216783	0.236928	0.236928	0.236928	0.228758	0.21732	0.228758	0.228758	0.20098	0.201031	0.201031	0.201031	0.201031	0.240924	0.242268	0.243986	0.24055	0.237113	0.237113	0.214777	0.211704	0.199313	0.199313	0.231959	0.223368	0.235395	0.233677	0.231959	0.228522	0.237113	0.233677	0.243986	0.235395	0.237113	0.23166	0.23166	0.23166	0.23166	0.233591	0.23166	0.23166	0.23166	0.23166	0.218147	0.196911
Aurelia_aurita	0.211246	0.211246	0.247328	0.237398	0.239482	0.229483	0.243161	0.243161	0.226444	0.237082	0.226444	0.226444	0.21044	0.209756	0.209756	0.209756	0.209756	0.259781	0.253659	0.255285	0.235772	0.23252	0.23252	0.232899	0.239414	0.20813	0.20813	0.245528	0.245528	0.24065	0.243067	0.24065	0.242276	0.250407	0.247154	0.255285	0.24878	0.250814	0.225177	0.225177	0.225177	0.225177	0.223404	0.22695	0.225177	0.225177	0.225177	0.223404	0.223404
[truncated: 48 more columns]

## Sheet: Caption
Table. Estimates of Evolutionary Divergence between Sequences
The number of amino acid differences per site from between sequences are shown. This analysis involved 98 amino acid sequences. All ambiguous positions were removed for each sequence pair (pairwise deletion option). There were a total of 1321 positions in
1. Kumar S., Stecher G., Li M., Knyaz C., and Tamura K. (2018). MEGA X: Molecular Evolutionary Genetics Analysis across computing platforms. Molecular Biology and Evolution 35:1547-1549.
2. Stecher G., Tamura K., and Kumar S. (2020). Molecular Evolutionary Genetics Analysis (MEGA) for macOS. Molecular Biology and Evolution (https://doi.org/10.1093/molbev/msz312).
Disclaimer: Although utmost care has been taken to ensure the correctness of the caption, the caption text is provided "as is" without any warranty of any kind. Authors advise the user to carefully check the caption prior to its use for any purpose and re
