# Supplementary material for: Identification of Cassiopea sp. in Lake Macquarie, Australia and revision of the taxonomic status of Cassiopea maremetens Gershwin, Zeidler & Davie, 2010 (Cnidaria: Scyphozoa: Cassiopeidae)
Source: PeerJ. 2025 Jul 18;13:e19669. doi: 10.7717/peerj.19669 (PMC12278942; doi:10.7717/peerj.19669)
Supplement: Supplemental Information 8 — Data used for the morphometric analysis. [file peerj-13-19669-s008.xlsx]

## Sheet: Morphology Data
G Number	Location	Species	Bell Diameter (cm)	Bell Height (cm)	Bell Height w oral disc (cm)	Bell Shape	Exumbrella colour	# of Rhopalia	# of lappets	Lappets/ paramere	Distinct Lappets?	Lappet Shape	Ring Canal	Oral disc width (cm)	Oral disc height (cm)	Subgenital pit shape	Subgenital pit size (cm)	# of Oral Arms	Oral arm longer than bell?	Oral Arm Length (cm)	Oral Arm Shape	Oral arm lateral branching radial pattern	Oral arm fork at end?	One side of fork stronger?	Oral arm lateral branching proximal to distal pattern	# of lateral branches	Lateral branch shape	Small appendage shape	Small appendage transparency	Large vesicle presence	# of large vesicles on arm	# of central vesicles	Large vesicle distribtion on arm	Location of largest vesicle	Large vesicle length (cm) ARM	Large vesicle length (cm) CENTRAL	Large vesicle width (cm) ARM	Large vesicle width (cm) CENTRAL	Large vesicle shape
G.20057	Coombabah Creek	sp3	15.4	0.2	1.6	circle	brown	17	88	4	yes	square and blunt	1	6.1	1.4	circle	1.1	8	yes	13.3	cylinder	alternating	yes	no	bifurcating	5	cylinder	leaf	brown	yes	1	6	fork	central	2.3	3.1	0.2	0.2	test tube
G.20058	Coombabah Creek	sp3	16.2	0.4	1.4	circle	brown	18	95	6	yes	square and blunt	1	6.1	1	circle	0.8	8	yes	11.9	cylinder	alternating	yes	no	alternating	5	cylinder	leaf	brown	yes	1	8	base	fork	6.2	3.3	0.4	0.2	test tube
G.20060	Coombabah Creek	sp3	18.2	0.5	2.1	circle	brown	20	83	5	yes	square and blunt	1	7.8	1.6	diamond	1.1	8	yes	14.7	cylinder	alternating	yes	no	alternating	7	cylinder	leaf	brown	yes	1	7	base	central	3.1	3.2	0.4	0.8	leaf
G.20059	Coombabah Creek	sp3	16.3	0.4	1.8	circle	brown	17	100	6	yes	square and blunt	1	5.9	1.4	circle	0.8	8	yes	14.6	cylinder	alternating	yes	no	alternating	5	cylinder	leaf	brown	yes	1	8	fork	fork	3.5	2.1	0.3	0.2	test tube
G.20061	Coombabah Creek	sp3	14.9	0.4	1.3	circle	brown	23	101	6	yes	square and blunt	1	5.9	0.9	circle	0.4	9	yes	11.6	triangle	alternating	yes	no	alternating and bifurcating	5	cylinder	leaf	opaque brown	yes	1	6	fork	central	1.5	2.4	0.2	0.2	test tube
G.20077	Lake Illawarra	sp3	7.2	0.4	1.8	circle	brown	19	70	3	yes	square and rounded	1	2.2	1.4	circle	0.2	8	yes	4.4	cylinder	alternating and pinnate	yes	no	alternating	5	cylinder	leaf	opaque	yes	4	3	evenly distributed	fork	1.2	0.9	0.2	0.4	leaf
G.20077	Lake Illawarra	sp3	7.3	0.2	1.2	circle	brown	19	58	3	yes	square and rounded	1	2.5	1	oval	0.3	8	yes	4.7	triangle	alternating and pinnate	yes	no	alternating	4	cylinder	leaf	opaque	yes	6	1	evenly distributed	central	1	1.1	0.3	0.2	leaf ribbon
G.20077	Lake Illawarra	sp3	5.4	0.2	0.6	circle	brown yellow	20	57	3	no	square and blunt	1	2.1	0.4	not developed	0	8	yes	3.6	cylinder	alternating and bifurcating	yes	no	alternating	4	cylinder	leaf	yellow	yes	2	2	evenly distributed	central	0.6	0.8	0.2	0.1	leaf
G.20077	Lake Illawarra	sp3	6.9	0.3	1.3	circle	brown	20	63	3	yes	square and blunt	1	2.5	1	circle	0	8	yes	3.9	cylinder	alternating and bifurcating	yes	no	alternating	4	cylinder	leaf	yellow	yes	5	7	evenly distributed	central	0.9	1.2	0.2	0.1	leaf
G.20077	Lake Illawarra	sp3	9.8	0.4	1.3	circle	brown	20	63	3	yes	square and blunt	1	3.2	0.9	circle	0	8	yes	4.6	cylinder	alternating and bifurcating	yes	no	alternating	3	cylinder	leaf	opaque	yes	5	4	evenly distributed	central	0.8	1.3	0.2	0.2	leaf ribbon
G.20077	Lake Illawarra	sp3	10.8	0.5	2.2	circle	brown	20	81	4	yes	square and rounded	1	4.2	1.7	oval	0.4	8	yes	7.7	cylinder	alternating	yes	no	alternating	5	cylinder	leaf	opaque	yes	5	14	evenly distributed	central	1	1.6	0.2	0.3	leaf
G.20077	Lake Illawarra	sp3	8.2	0.2	1.8	circle	brown	23	66	3	yes	square and rounded	1	2.8	1.6	oval	0.2	8	yes	5.1	cylinder	alternating and bifurcating	yes	no	alternating	4	cylinder	leaf	opaque	yes	6	11	evenly distributed	central	0.9	1.7	0.2	0.2	leaf
G.20077	Lake Illawarra	sp3	10.5	0.4	1.5	circle	brown	23	83	4	yes	square and rounded	1	3.8	1.1	oval	0.4	8	yes	7.3	cylinder	alternating and pinnate	yes	no	alternating	5	cylinder	leaf	opaque	yes	7	3	evenly distributed	central	1.4	1.6	0.4	0.2	leaf ribbon
G.20077	Lake Illawarra	sp3	15.1	0.8	3.4	circle	brown	23	81	3	yes	square and blunt	1	5.7	2.6	circle	0.6	6	yes	12.2	cylinder	alternating and bifurcating	yes	no	alternating	4	cylinder	leaf	opaque	yes	5	13	evenly distributed	central	1	1.6	0.2	0.2	leaf ribbon
G.18075	Lake Illawarra	sp3	9.2	0.3	1	circle	yellow	16	55	4	no	square and rounded	1	3.2	0.7	circle	0.2	8	same length	4.9	cylinder	alternating	yes	no	bifurcating	4	cylinder	leaf	opaque	yes	1	2	fork	fork	1	0.9	0.1	0.1	leaf
G.18734	Lake Macquarie	xamachana	17.2	0.2	1.7	circle	brown yellow	13	102	6	no	rectangular and blunt	1	5.6	1.5	circle	0.4	8	yes	9	cylinder	alternating	yes	yes	alternating	7	cylinder	leaf	opaque	yes	4	1	evenly distributed	fork	2.9	2.2	0.9	0.9	leaf
G.18733	Lake Macquarie	xamachana	19.8	0.4	0.6	circle	brown green	15	99	6	no	square and blunt	1	7.8	0.2	circle	0.4	7	yes	9	cylinder	alternating	yes	yes	alternating	6	cylinder	leaf	opaque	yes	7	1	evenly distributed	fork	3.2	1.8	1.6	1.1	leaf
G.18528	Lake Macquarie	xamachana	6.1	0.6	1.8	circle	yellow	16	70	5	yes	square and rounded	1	2.3	1.2	not developed	0	8	yes	3.7	cylinder	alternating	yes	yes	alternating	5	cylinder	leaf	opaque	yes	3	1	evenly distributed	fork	1.2	0	0.4	0	leaf
G.18722	Lake Macquarie	xamachana	10.3	0.2	0.9	circle	brown green	16	95	6	no	square and blunt	1	3.9	0.7	circle	0.3	8	sometimes	6.1	cylinder	alternating	yes	yes	alternating	6	cylinder	leaf	opaque	yes	2	1	evenly distributed	fork	2.1	1.8	0.4	0.4	leaf
G.18726	Lake Macquarie	xamachana	12	0.4	1.1	circle	brown yellow	16	84	6	no	square and rounded	1	4.8	0.7	circle	0.4	8	yes	7	cylinder	alternating	yes	yes	alternating	4	cylinder	leaf	opaque	yes	4	1	evenly distributed	fork	3	1.4	1.2	0.4	leaf
G.18362	Lake Macquarie	xamachana	12.6	0.4	1.8	circle	brown yellow	16	100	7	no	square and rounded	1	5.3	1.4	circle	0.4	8	yes	7.4	cylinder	alternating	yes	yes	alternating	5	cylinder	leaf	opaque	yes	10	1	evenly distributed	fork	2.7	2	0.5	0.5	leaf
G.18362	Lake Macquarie	xamachana	13.1	0.3	1.6	circle	brown yellow	16	95	6	no	square and rounded	1	5.3	1.3	circle	0.4	8	yes	8.2	cylinder	alternating	yes	yes	alternating	5	cylinder	leaf	opaque	yes	11	1	evenly distributed	fork	3.3	2.4	0.7	0.7	leaf
G.18362	Lake Macquarie	xamachana	16.7	0.6	2.5	circle	green yellow	16	99	6	yes	square and rounded	1	6.3	1.9	diamond	1.1	8	yes	9.7	cylinder	alternating	yes	yes	alternating	6	cylinder	leaf	opaque	yes	10	1	evenly distributed	fork	3.6	3.4	0.6	0.7	leaf
G.18730	Lake Macquarie	xamachana	19.2	0.4	1.5	circle	brown yellow	16	91	5	no	square and blunt	1	6.6	1.1	circle	1	8	yes	11.6	cylinder	alternating	yes	yes	alternating	5	cylinder	leaf	opaque	yes	7	1	evenly distributed	fork	4.5	2.5	1.1	0.8	leaf
G.18732	Lake Macquarie	xamachana	19.7	0.4	1.1	circle	brown yellow	16	93	6	no	rectangular and rounded	1	5	0.7	circle	0.8	8	yes	12	cylinder	alternating	yes	yes	alternating	6	cylinder	leaf	opaque	yes	8	1	evenly distributed	fork	3.5	1.6	0.7	1	leaf
G.18728	Lake Macquarie	xamachana	11.3	0.3	1.4	circle	brown yellow	17	88	5	no	square and blunt	1	3.9	1.1	circle	0.4	6	yes	7	cylinder	alternating	yes	yes	alternating	5	cylinder	leaf	opaque	yes	7	0	evenly distributed	fork	3.5	1.2	1	0.8	leaf
G.18724	Lake Macquarie	xamachana	12.2	0.4	1.4	circle	brown yellow	17	88	5	no	square and rounded	1	4	1	circle	0.2	8	yes	8.7	flat	alternating	yes	yes	alternating	6	cylinder	leaf	opaque	yes	7	2	evenly distributed	fork	3.5	1.9	1.2	0.6	leaf
G.18362	Lake Macquarie	xamachana	13.3	0.4	1.8	circle	yellow	17	100	5	yes	square and rounded	1	5.4	1.4	circle	0.4	8	yes	9.4	cylinder	alternating	yes	yes	alternating	6	cylinder	leaf	opaque	yes	11	1	evenly distributed	fork	4	2.7	0.7	0.5	leaf
G.18735	Lake Macquarie	xamachana	14.2	0.3	1.3	circle	brown yellow	17	95	7	no	square and blunt	1	6.7	1	circle	0.1	8	yes	6	cylinder	alternating	yes	yes	alternating	6	cylinder	leaf	opaque	yes	6	0	evenly distributed	fork	2.9	1	0.9	1	leaf
G.18731	Lake Macquarie	xamachana	20.9	1.7	2.9	circle	brown yellow	17	93	5	no	rectangular and rounded	1	7.7	1.2	circle	0.7	8	yes	14.5	cylinder	alternating	yes	yes	alternating	7	cylinder	leaf	opaque	yes	12	1	tip of arm	fork	4.3	2.2	1.3	1.1	leaf
G.18362	Lake Macquarie	xamachana	17.4	0.6	2.6	circle	green brown yellow	18	107	5	yes	square and rounded	1	7.1	2	circle	0.6	8	yes	10.4	cylinder	alternating	yes	yes	alternating	5	cylinder	leaf	opaque	yes	16	1	evenly distributed	fork	3.5	2.9	0.6	0.5	leaf
G.18362	Lake Macquarie	xamachana	7.1	0.2	0.7	circle	brown yellow	19	106	5	no	square and rounded	1	2.5	0.5	not developed	0	8	yes	4.2	cylinder	alternating	yes	yes	alternating	7	cylinder	leaf	opaque	yes	6	0	evenly distributed	fork	1.8	0	0.5	0	leaf
G.18363	Lake Macquarie	xamachana	17.5	0.6	2.4	circle	yellow/ opaque	19	81	5	yes	square and blunt	1	6.8	1.8	circle	0.4	8	yes	10	cylinder	alternating	yes	yes	alternating	7	cylinder	leaf	opaque	yes	10	1	evenly distributed	fork	2.5	1.9	0.6	0.4	leaf
G.18428	Lake Macquarie	xamachana	13.4	0.8	1.5	circle	green	20	105	4	yes	square and rounded	1	4.7	0.7	circle	0.4	8	same length	6.7	cylinder	alternating	yes	yes	alternating	6	cylinder	leaf	green	yes	9	1	evenly distributed	fork	2.1	1.9	0.5	0.6	leaf
G.18362	Lake Macquarie	xamachana	19.7	0.6	2	circle	brown green	22	101	4	yes	square and rounded	1	7.3	1.4	circle	11.2	8	yes	12.8	cylinder	alternating	yes	yes	alternating	6	cylinder	leaf	opaque	yes	17	2	evenly distributed	fork	3.6	3	0.9	0.9	leaf
G.18365	Lake Macquarie	xamachana	17	0.9	2.6	circle	brown yellow	23	117	5	yes	square and rounded	1	6.7	1.7	circle	0.6	8	same length	8.9	cylinder	alternating	yes	yes	alternating	5	cylinder	leaf	opaque	yes	21	1	evenly distributed	fork	3.9	2.3	0.6	0.5	leaf
G.18362	Lake Macquarie	xamachana	19.6	0.8	2.8	circle	brown green	25	107	4	yes	square and rounded	1	8.2	2	circle	1.2	8	yes	12.1	cylinder	alternating	yes	yes	alternating	7	cylinder	leaf	opaque	yes	17	1	evenly distributed	fork	4.6	3.2	1	0.8	leaf
G.18720	Lake Macquarie	xamachana	20	0.6	2	circle	green brown yellow	16	85	5	no	rectangular and blunt	1	7.9	1.4	circle	1	8	yes	12.3	cylinder	alternating	yes	yes	alternating	7	cylinder	leaf	opaque	yes	10	1	evenly distributed	fork	4.5	2.2	0.9	1.4	leaf
G.18721	Lake Macquarie	xamachana	14.3	0.4	1	circle	brown green	16	91	6	no	square and rounded	1	4.5	0.6	circle	0.3	8	yes	8.4	cylinder	alternating	yes	yes	alternating	5	cylinder	leaf	opaque	yes	5	1	tip of arm	fork	3.6	1.5	0.5	0.5	leaf
G.18723	Lake Macquarie	xamachana	12	0.3	0.8	circle	brown green	17	94	5	no	square and blunt	1	4.4	0.5	circle	0.3	8	yes	7.2	cylinder	alternating	yes	yes	alternating	7	cylinder	leaf	opaque	yes	2	1	fork	fork	2.6	1.9	0.7	1	leaf
G.18725	Lake Macquarie	xamachana	12.9	0.4	1.5	circle	brown yellow	17	92	5	no	rectangular and blunt	1	4.3	1.1	circle	0.4	8	yes	8	cylinder	alternating	yes	yes	alternating	5	cylinder	leaf	opaque	yes	6	1	evenly distributed	fork	3.4	2.1	0.8	0.6	leaf
G.18364	Lake Macquarie	xamachana	13.4	0.6	1.8	circle	opaque yellow	20	104	5	yes	square and rounded	1	4.9	1.2	circle	0.3	8	same length	6.2	cylinder	alternating	yes	yes	alternating	7	cylinder	leaf	opaque	yes	7	1	evenly distributed	fork	3.1	1.5	0.6	0.4	leaf
G.17363	Lake Alexander	xamachana	5.7	0.1	0.4	circle	yellow	19	88	5	no	square and rounded	1	2.9	0.3	not developed	0	8	yes	3.9	cylinder	alternating and bifurcating	yes	no	bifurcating	4	cylinder	leaf	opaque	yes	0	10	absent	central	0	0.7	0	0.1	leaf
G.17374	Lake Alexander	xamachana	6.8	0.1	0.3	circle	opaque	21	74	3	no	square and rounded	1	2.5	0.2	circle	0.2	7	sometimes	4.8	cylinder	pinnate	yes	no	alternating	4	cylinder	leaf	opaque	yes	0	1	absent	central	0	0.9	0	0.1	leaf
G.20068	Pelican Waters	xamachana	16.1	0.5	1.7	circle	brown green	18	85	5	yes	rounded	1	6.7	1.2	circle	0.6	8	yes	12.2	cylinder	alternating	yes	yes	alternating	6	cylinder	leaf	brown	yes	4	1	evenly distributed	central	2	3	0.5	1.1	leaf
G.20069	Pelican Waters	xamachana	15.5	0.4	2	circle	brown green	18	94	5	yes	square and rounded	1	5.5	1.6	circle	0.4	8	yes	11.5	cylinder	alternating	yes	yes	alternating	5	cylinder	leaf	brown	yes	3	1	evenly distributed	fork	2.3	1.8	0.4	0.6	leaf
G.326486	Pelican Waters	xamachana	17.5	0.4	1.9	circle	green yellow	19	104	5	no	square and blunt	1	5.9	1.5	diamond	0.9 high, 0.4 wide	8	yes	12.3	flat	alternating	yes	yes	alternating	7	cylinder	leaf	opaque	yes	2	1	evenly distributed	fork	3.4	2.1	0.4	0.4	leaf
G.17387	PNG	sp2	5.2	0.1	0.2	circle	opaque	16	80	5	no	rounded	0	1.6	0.1	not developed	0	8	no	2.6	flat	alternating	yes	no	alternating	3	flat	leaf	opaque	yes	1	3	fork	fork	1.6	0.6	0.1	0.1	leaf
G.17385	PNG	sp2	7.3	0.1	0.4	circle	yellow	16	64	5	no	rounded	1	2.2	0.3	circle	0.2	8	yes	6.6	flat	bifurcating	yes	yes	alternating	5	flat	leaf	yellow	yes	0	1	absent	central	0	1.3	0	0.2	leaf
G.17385	PNG	sp2	9	0.1	0.4	circle	yellow	16	67	5	no	square and rounded	1	3.4	0.3	circle	0.2	8	yes	8.2	flat	alternating and bifurcating	yes	no	alternating	5	flat	leaf	yellow	yes	0	1	absent	central	0	1.2	0	0.3	leaf
G.17385	PNG	sp2	10.5	0.2	0.7	circle	yellow	16	75	5	no	square and rounded	0	4.1	0.5	circle	0.3	8	yes	8.4	cylinder	alternating	yes	no	alternating	4	flat	leaf	opaque yellow	yes	0	1	absent	central	0	2	0	0.2	leaf
G.17385	PNG	sp2	7.7	0.1	0.3	circle	yellow	17	70	4	no	square and rounded	1	2.9	0.2	circle	0.2	8	sometimes	4.7	flat	bifurcating	yes	yes	alternating and bifurcating	5	flat	leaf	opaque yellow	yes	0	1	absent	central	0	2.3	0	0.2	leaf
G.17370	PNG	sp2	8.9	0.1	0.8	circle	yellow	17	88	5	no	square and rounded	1	3.3	0.7	circle	0.3	8	same length	4.7	cylinder	pinnate	yes	no	bifurcating	4	cylinder	leaf	opaque	yes	3	3	evenly distributed	fork	2	1	0.8	0.1	leaf
G.20076	Port Hacking	sp3	7.3	0.4	1	circle	brown	16	80	5	yes	square	1	3.2	0.6	circle	0.2	8	same length	4	cylinder	alternating and pinnate	yes	no	alternating	4	cylinder	leaf	opaque	yes	1	4	fork	central	1.2	1.4	0.2	0.2	test tube
G.20076	Port Hacking	sp3	8.7	0.7	1.4	circle	brown green	16	80	5	yes	square and blunt	1	3.3	0.3	circle	0.2	8	same length	5.2	cylinder	alternating and pinnate	yes	no	alternating	4	cylinder	leaf	opaque	yes	1	4	fork	central	1.5	1.6	0.3	0.2	test tube
G.20076	Port Hacking	sp3	11	0.5	1.4	circle	brown	16	80	4	yes	square and blunt	1	3.2	0.6	oval	0.2	8	same length	5.8	cylinder	pinnate	yes	no	alternating	6	cylinder	leaf	opaque	yes	1	5	fork	central	1.4	1.6	0.3	0.2	test tube
G.20076	Port Hacking	sp3	13.2	1.4	0.6	circle	brown	16	80	4	yes	square and blunt	1	3.4	0.8	circle	0.4	8	yes	7.2	cylinder	alternating and pinnate	yes	no	alternating	5	cylinder	leaf	brown	yes	1	4	fork	central	2	2.1	0.5	0.2	leaf ribbon
G.20076	Port Hacking	sp3	11.2	0.7	1.1	circle	brown	17	85	5	yes	square	1	4.2	0.4	circle	0.2	8	same length	6.4	cylinder	pinnate	yes	no	alternating	4	cylinder	leaf	opaque	yes	1	5	fork	central	1.5	1.6	0.3	0.2	test tube
G.20076	Port Hacking	sp3	12.7	0.4	1.3	circle	brown	20	116	5	yes	square and blunt	1	4.8	0.9	circle	0.2	8	yes	7.1	cylinder	alternating and pinnate	yes	no	alternating	4	cylinder	leaf	brown	yes	3	9	tip of arm	same	2	2	0.4	0.3	leaf ribbon
G.20076	Port Hacking	sp3	12.8	0.4	1.8	circle	brown green	20	100	5	yes	square and blunt	1	4.9	1.4	circle	0.2	8	yes	7.2	cylinder	alternating and pinnate	yes	no	alternating	4	cylinder	leaf	brown	yes	2	7	evenly distributed	central	1.6	2.1	0.2	0.2	test tube
G.18144	Wallis Lake	xamachana	5.2	0.7	1.4	circle	yellow	11	49	5	yes	square and blunt	1	1.8	0.7	not developed	0	8	same length	2.6	cylinder	alternating	yes	yes	alternating	4	cylinder	leaf	opaque	yes	1	0	fork	fork	0.8	0	0.1	0	leaf
G.18741	Wallis Lake	xamachana	18.7	1.3	2.8	circle	brown yellow	12	93	5	no	rectangular and blunt	1	6.5	1.5	circle	0.7	8	yes	8	cylinder	alternating	yes	yes	alternating	6	cylinder	leaf	opaque	yes	7	1	evenly distributed	fork	4.3	3	1	1.8	leaf
G.18152	Wallis Lake	xamachana	10.3	0.3	1.5	circle	yellow	12	50	5	no	square and blunt	1	4.4	1.2	circle	0.4	8	yes	7.3	cylinder	alternating	yes	yes	alternating	5	cylinder	leaf	opaque	yes	5	1	evenly distributed	fork	1.4	1.2	0.3	0.3	leaf
G.18154	Wallis Lake	xamachana	9.7	0.3	1.6	circle	yellow	12	77	4	yes	square and rounded	1	3.9	1.3	circle	0.3	8	yes	6.5	cylinder	alternating	yes	yes	alternating	5	cylinder	leaf	opaque	yes	8	0	evenly distributed	fork	1.9	0	0.7	0	leaf
G.18156	Wallis Lake	xamachana	6.4	0.3	0.7	circle	opaque	13	71	6	yes	square and rounded	1	2.4	0.4	circle	0.1	8	no	3.4	cylinder	alternating	yes	no	alternating	5	cylinder	leaf	opaque yellow	yes	4	1	evenly distributed	fork	1.5	0	0.2	0	leaf
G.18153	Wallis Lake	xamachana	9.6	0.1	1.4	circle	yellow	13	78	5	yes	square and blunt	1	3.6	1.3	circle	0.1	8	same length	4.5	cylinder	alternating	yes	yes	alternating	4	cylinder	leaf	opaque	yes	4	1	evenly distributed	fork	1.4	0.9	0.3	0.15	leaf
G.18736	Wallis Lake	xamachana	20.9	0.3	0.8	circle	brown yellow	14	98	7	no	square and rounded	1	8.2	0.5	circle	0.4	8	yes	9	cylinder	alternating	yes	yes	alternating	6	cylinder	leaf	opaque	yes	7	1	evenly distributed	fork	3.7	3.2	1.1	1.1	test tube
G.18738	Wallis Lake	xamachana	8.9	0.3	0.8	circle	brown yellow	15	76	5	no	square and blunt	1	2.7	0.5	circle	0.1	8	yes	3.5	cylinder	alternating	yes	yes	alternating	6	cylinder	leaf	opaque	yes	1	1	tip of arm	fork	2.4	1.1	0.4	0.3	leaf
G.18139	Wallis Lake	xamachana	11.3	0.4	2.1	circle	yellow	15	70	4	yes	rounded	1	4.8	1.7	circle	0.4	8	yes	7.1	cylinder	alternating	yes	yes	alternating	5	cylinder	leaf	opaque	yes	16	1	evenly distributed	fork	3.2	2.1	1.2	0.4	leaf
G.18748	Wallis Lake	xamachana	13.1	0.3	1	circle	brown yellow	15	83	5	no	square and rounded	1	3.8	0.7	circle	0.1	8	yes	6.1	cylinder	alternating	yes	yes	alternating	6	cylinder	leaf	opaque	yes	2	1	evenly distributed	fork	2.3	1.8	0.8	0.8	leaf
G.18137	Wallis Lake	xamachana	12.3	0.5	1.5	circle	yellow	15	83	6	yes	square and blunt	1	4.4	1	circle	0.3	8	same length	6.8	cylinder	alternating	yes	yes	alternating	5	cylinder	leaf	opaque	yes	9	1	evenly distributed	fork	2.5	1.8	0.8	0.5	leaf
G.18156	Wallis Lake	xamachana	6.4	0.2	0.5	circle	opaque	16	40	5	yes	rounded	1	2.3	0.3	circle	0.1	8	no	2.8	cylinder	alternating	yes	yes	alternating	4	cylinder	leaf	opaque	yes	2	1	evenly distributed	equal	0.4	0.4	0.1	0.1	leaf
G.18745	Wallis Lake	xamachana	19.1	0.3	1.1	circle	brown green	16	100	7	no	rectangular and blunt	1	6.4	0.8	circle	0.8	8	yes	10	cylinder	alternating	yes	yes	alternating	6	cylinder	leaf	opaque	yes	5	1	evenly distributed	fork	3.5	2.6	0.8	0.8	leaf
G.18750	Wallis Lake	xamachana	19.4	0.5	2.1	circle	brown	16	64	4	no	square and rounded	1	4.9	1.6	circle	0.5	8	yes	9.5	cylinder	alternating	yes	yes	alternating	4	cylinder	leaf	opaque	yes	4	1	tip of arm	fork	3.2	2	0.7	1.6	leaf
G.18742	Wallis Lake	xamachana	19.4	0.5	1.8	circle	green yellow	16	107	6	no	rectangular and blunt	1	7.2	1.3	circle	0.8	8	yes	11	cylinder	alternating	yes	yes	alternating	7	cylinder	leaf	opaque	yes	5	1	evenly distributed	fork	4.1	3.6	1.1	1.1	leaf
G.18749	Wallis Lake	xamachana	22.3	0.8	2.8	circle	green brown yellow	16	107	7	no	square and blunt	1	7.7	2	circle	1	8	yes	10	cylinder	alternating	yes	yes	alternating	7	cylinder	leaf	opaque	yes	8	1	evenly distributed	fork	4.1	3	1.4	0.8	test tube
G.18739	Wallis Lake	xamachana	24	1.4	2.1	circle	brown yellow	16	87	5	no	rectangular and rounded	1	7.5	0.7	circle	0.6	8	yes	10	cylinder	alternating	yes	yes	alternating	7	cylinder	leaf	opaque	yes	12	2	evenly distributed	fork	5	2.6	0.9	0.6	leaf
G.18753	Wallis Lake	xamachana	12	0.6	1.5	flat disc	brown	16	64	4	no	square and blunt	1	4.6	0.9	circle	0.3	8	yes	6.7	cylinder	alternating	yes	yes	alternating	4	cylinder	leaf	opaque	yes	4	1	evenly distributed	fork	2.6	1.2	0.7	0.7	leaf
G.18139	Wallis Lake	xamachana	7.7	0.2	0.7	circle	yellow	17	96	4	no	square and rounded	1	2.9	0.5	circle	0.2	8	same length	4.2	cylinder	alternating	yes	yes	alternating	4	cylinder	leaf	opaque	yes	5	1	tip of arm	fork	2.1	1.4	0.4	0.2	leaf
G.18156	Wallis Lake	xamachana	7.8	0.2	0.6	circle	yellow	17	82	5	yes	square and blunt	1	2.2	0.4	circle	0.2	8	no	4.3	cylinder	alternating	yes	yes	alternating	4	cylinder	leaf	opaque	yes	4	0	tip of arm	fork	1.6	0	0.2	0	leaf
G.18139	Wallis Lake	xamachana	10.4	0.4	0.9	circle	yellow	17	85	5	no	square and rounded	1	4.2	0.5	circle	0.3	8	same length	5.3	cylinder	alternating	yes	yes	alternating	5	cylinder	leaf	opaque	yes	10	1	evenly distributed	fork	2.9	1.9	0.9	0.9	leaf
G.18755	Wallis Lake	xamachana	20.8	1.5	2.5	flat disc	brown	17	68	4	no	square and rounded	1	6.9	1	circle	1.1	8	yes	9.6	cylinder	alternating	yes	yes	alternating	9	cylinder	leaf	opaque	yes	4	4	base and fork	fork	4.2	3.2	0.9	1.1	leaf
G.18139	Wallis Lake	xamachana	6.4	0.2	0.8	circle	yellow	18	77	4	no	square and rounded	1	2.3	0.6	not developed	0	8	no	3.2	cylinder	alternating	yes	yes	alternating	5	cylinder	leaf	opaque	yes	4	1	tip of arm	fork	1.7	0.9	0.3	0.2	leaf
G.18156	Wallis Lake	xamachana	7.2	0.2	0.4	circle	opaque	18	88	4	yes	square and rounded	1	2.7	0.2	circle	0.1	8	yes	4.3	cylinder	alternating	yes	yes	alternating	5	cylinder	leaf	opaque	yes	3	1	tip of arm	fork	1.3	0.7	0.3	0.2	leaf
G.18139	Wallis Lake	xamachana	7.7	0.3	0.7	circle	brown yellow	18	91	5	no	rounded	1	3.3	0.4	circle	0.2	8	same length	4.3	cylinder	alternating	yes	yes	alternating	5	cylinder	leaf	opaque	yes	7	1	evenly distributed	fork	2.1	1.3	0.4	0.3	leaf
G.18139	Wallis Lake	xamachana	11.2	0.3	1.3	circle	yellow	18	100	6	no	square and rounded	1	4.3	1	circle	0.4	8	same length	5.6	cylinder	alternating	yes	yes	alternating	5	cylinder	leaf	opaque	yes	11	1	evenly distributed	fork	3.1	2.6	1.1	0.3	leaf
G.18139	Wallis Lake	xamachana	12.7	0.7	2.1	circle	yellow	18	97	5	yes	square and rounded	1	5.8	1.4	circle	0.4	8	no	6.6	cylinder	alternating	yes	yes	alternating	5	cylinder	leaf	opaque	yes	11	0	tip of arm	fork	3.5	0	1.4	0	leaf
G.18754	Wallis Lake	xamachana	11	0.7	1.1	flat disc	brown	18	90	5	no	square and rounded	1	2	0.4	circle	0.3	8	yes	6	cylinder	alternating	yes	yes	alternating	4	cylinder	leaf	opaque	yes	2	2	base and fork	fork	1.4	0.8	0.6	0.1	leaf
G.18752	Wallis Lake	xamachana	15.1	0.5	1.8	flat disc	brown	18	72	4	no	square and blunt	1	5.3	1.3	circle	0.6	8	yes	9.6	cylinder	alternating	yes	yes	alternating	7	cylinder	leaf	opaque	yes	4	2	tip of arm	fork	3.4	3.2	1.1	1.1	leaf
G.18139	Wallis Lake	xamachana	9.2	0.3	1.2	circle	yellow	19	105	5	yes	square and blunt	1	3.1	0.9	circle	0.2	8	no	4.2	cylinder	alternating	yes	yes	alternating	4	cylinder	leaf	opaque	yes	9	1	evenly distributed	fork	2.6	2.1	0.6	0.4	leaf
G.18746	Wallis Lake	xamachana	15.1	0.3	0.9	circle	brown yellow	19	94	5	no	square and blunt	1	4.4	0.6	circle	0.3	7	yes	8.5	cylinder	alternating	yes	yes	alternating	6	cylinder	leaf	opaque	yes	5	1	evenly distributed	fork	2.3	1	0.6	0.6	leaf
G.18139	Wallis Lake	xamachana	12.1	0.3	2.1	circle	brown yellow	21	89	5	yes	square and rounded	1	5.2	1.8	circle	0.3	8	yes	6.7	cylinder	alternating	yes	yes	alternating	5	cylinder	leaf	opaque	yes	17	1	evenly distributed	fork	3.4	1.9	0.6	0.4	leaf
G.18139	Wallis Lake	xamachana	10.9	0.4	1.9	circle	brown yellow	22	87	5	yes	square and rounded	1	4.5	1.5	circle	0.3	8	sometimes	6.7	cylinder	alternating	yes	yes	alternating	5	cylinder	leaf	opaque	yes	11	1	evenly distributed	fork	2.9	1.6	0.6	0.3	leaf
G.18149	Wallis Lake	xamachana	8.8	0.2	1.2	circle	yellow	16	87	6	yes	square and blunt	1	3.2	1	circle	0.2	8	same length	5	cylinder	alternating	yes	yes	alternating	4	cylinder	leaf	opaque	yes	4	0	evenly distributed	fork	1.7	0	0.4	0	leaf
G.18148	Wallis Lake	xamachana	8.8	0.3	0.9	circle	yellow	16	82	4	yes	square and rounded	1	3.1	0.6	circle	0.2	8	no	4.6	cylinder	alternating	yes	yes	alternating	5	cylinder	leaf	opaque	yes	3	1	tip of arm	fork	1.5	0.8	0.4	0.2	leaf
