# Supplementary material for: Identification of Cassiopea sp. in Lake Macquarie, Australia and revision of the taxonomic status of Cassiopea maremetens Gershwin, Zeidler & Davie, 2010 (Cnidaria: Scyphozoa: Cassiopeidae)
Source: PeerJ. 2025 Jul 18;13:e19669. doi: 10.7717/peerj.19669 (PMC12278942; doi:10.7717/peerj.19669)
Supplement: Supplemental Information 9 — Rhopalia, bell height, total height, oral disc width, oral disc height, arm vesicles, arm vesicle width and central vesicle length are divided by bell diameter. Z-score calculated for lappets, subgenital pit, lateral branches, and central vesicle width. For distinct lappets, 1 represents no, 2-yes. Lappet shape, 1-rectangular and blunt, 2- rectangular and round, 3- rounded, 4- square, 5- square and blunt, 6- square and round. Arm longer than bell 1- no, 2- same, 3- sometimes, 4-yes. Arm Shape 1-flat, 2-cylinder, 3-traingle. Branching pattern 1- alternating, 2- alternating and bifurcating, 3- bifurcating, 4- pinnate. Fork strength 1- equal, 2- one side stronger. Arm vesicle distribution 1- absent, 2- base, 3- base and fork, 4- evenly distributed, 5- fork, 6- tip of arm. Large vesicle location 1-central, 2-equal, 3-fork. Vesical shape 1-leaf, 2- test tube and leaf, 3- test tube. [file peerj-13-19669-s009.xlsx]

## Sheet: Sheet1
G Number	Location	Species	LocationID	SpeciesID	Rhopalia	OralArms	CentralVesicles	BellHeight	TotalHeight	OralDiscWidth	OralDiscHeight	ArmVesicles	ArmVesicleLength	CentralVesicleLength	ArmVesicleWidth	Lappets	LappetsParamere	SubgenitalPit	LateralBranches	CentralVesicleWidth	DistinctLappets	LappetShape	ArmLongerBell	ArmShape	BranchingPattern	ForkStrength	ArmVesicleDistribution	LargeVesicleLocation	VesicleShape
G.20057	Coombabah Creek	sp3	Coombabah Creek G.20057	sp3 G.20057	1.1	8	7	1.01	1.1	1.4	1.09	1.06	1.15	1.2	1.01	6.19	5.08	6.46	5.76	5.32	2	5	4	2	1	1	5	1	3
G.20058	Coombabah Creek	sp3	Coombabah Creek G.20058	sp3 G.20058	1.11	8	9	1.02	1.09	1.38	1.06	1.06	1.38	1.2	1.02	6.64	7.05	6.22	5.76	5.32	2	5	4	2	1	1	2	3	3
G.20060	Coombabah Creek	sp3	Coombabah Creek G.20060	sp3 G.20060	1.1	8	8	1.03	1.12	1.43	1.09	1.05	1.17	1.18	1.02	5.88	6.07	6.46	7.49	6.86	2	5	4	2	1	1	2	1	1
G.20061	Coombabah Creek	sp3	Coombabah Creek G.20061	sp3 G.20061	1.54	9	7	1.03	1.09	1.4	1.06	1.07	1.1	1.16	1.01	7.02	7.05	5.91	5.76	5.32	2	5	4	3	1	1	5	1	3
G.20059	Coombabah Creek	sp3	Coombabah Creek G.20059	sp3 G.20059	1.04	8	9	1.02	1.11	1.36	1.09	1.06	1.21	1.13	1.02	6.95	7.05	6.22	5.76	5.32	2	5	4	2	1	1	5	3	3
G.20077	Lake Illawarra	sp3	Lake Illawarra G.20077	sp3 G.20077	1.85	8	15	1.05	1.2	1.39	1.16	1.46	1.09	1.15	1.02	5.75	5.08	5.91	5.76	5.57	2	6	4	2	1	1	4	1	1
G.20077	Lake Illawarra	sp3	Lake Illawarra G.20077	sp3 G.20077	1.52	6	14	1.05	1.23	1.38	1.17	1.33	1.07	1.11	1.01	5.75	4.1	6.06	4.9	5.32	2	5	4	2	2	1	4	1	2
G.18075	Lake Illawarra	sp3	Lake Illawarra G.18075	sp3 G.18075	1.74	8	3	1.03	1.11	1.35	1.08	1.11	1.11	1.1	1.01	4.1	5.08	5.75	4.9	5.06	1	6	2	2	1	1	5	3	1
G.20077	Lake Illawarra	sp3	Lake Illawarra G.20077	sp3 G.20077	3.7	8	3	1.04	1.11	1.39	1.07	1.37	1.11	1.15	1.04	4.23	4.1	5.59	4.9	5.06	1	5	4	2	2	1	4	1	1
G.20077	Lake Illawarra	sp3	Lake Illawarra G.20077	sp3 G.20077	2.9	8	8	1.04	1.19	1.36	1.14	1.72	1.13	1.17	1.03	4.61	4.1	5.59	4.9	5.06	2	5	4	2	2	1	4	1	1
G.20077	Lake Illawarra	sp3	Lake Illawarra G.20077	sp3 G.20077	2.6	8	2	1.03	1.16	1.34	1.14	1.82	1.14	1.15	1.04	4.29	4.1	5.83	4.9	5.32	2	6	4	3	2	1	4	1	2
G.20077	Lake Illawarra	sp3	Lake Illawarra G.20077	sp3 G.20077	2.64	8	4	1.06	1.25	1.31	1.19	1.56	1.17	1.13	1.03	5.05	4.1	5.75	5.76	5.83	2	6	4	2	2	1	4	3	1
G.20077	Lake Illawarra	sp3	Lake Illawarra G.20077	sp3 G.20077	2.04	8	5	1.04	1.13	1.33	1.09	1.51	1.08	1.13	1.02	4.61	4.1	5.59	4.04	5.32	2	5	4	2	2	1	4	1	2
G.20077	Lake Illawarra	sp3	Lake Illawarra G.20077	sp3 G.20077	2.8	8	12	1.02	1.22	1.34	1.2	1.73	1.11	1.21	1.02	4.8	4.1	5.75	4.9	5.32	2	6	4	2	2	1	4	1	1
G.20077	Lake Illawarra	sp3	Lake Illawarra G.20077	sp3 G.20077	2.19	8	4	1.04	1.14	1.36	1.1	1.67	1.13	1.15	1.04	5.88	5.08	5.91	5.76	5.32	2	6	4	2	2	1	4	1	2
G.18528	Lake Macquarie	xamachana	Lake Macquarie G.18528	xamachana G.18528	2.62	8	2	1.1	1.3	1.38	1.2	1.49	1.2	1	1.07	5.05	6.07	5.59	5.76	4.81	2	6	4	2	1	2	4	3	1
G.18362	Lake Macquarie	xamachana	Lake Macquarie G.18362	xamachana G.18362	1.27	8	2	1.03	1.14	1.42	1.11	1.79	1.21	1.16	1.04	6.95	8.04	5.91	5.76	6.09	1	6	4	2	1	2	4	3	1
G.18724	Lake Macquarie	xamachana	Lake Macquarie G.18724	xamachana G.18724	1.39	8	3	1.03	1.11	1.33	1.08	1.57	1.29	1.16	1.1	6.19	6.07	5.75	6.63	6.34	1	6	4	1	1	2	4	3	1
G.18734	Lake Macquarie	xamachana	Lake Macquarie G.18734	xamachana G.18734	0.76	8	2	1.01	1.1	1.33	1.09	1.23	1.17	1.13	1.05	7.08	7.05	5.91	7.49	7.11	1	1	4	2	1	2	4	3	1
G.18362	Lake Macquarie	xamachana	Lake Macquarie G.18362	xamachana G.18362	1.03	8	2	1.03	1.15	1.41	1.11	1.92	1.2	1.17	1.03	7.4	6.07	6.06	5.76	6.09	2	6	4	2	1	2	4	3	1
G.18362	Lake Macquarie	xamachana	Lake Macquarie G.18362	xamachana G.18362	0.96	8	2	1.04	1.15	1.38	1.11	1.6	1.22	1.2	1.04	6.89	7.05	6.46	6.63	6.6	2	6	4	2	1	2	4	3	1
G.18732	Lake Macquarie	xamachana	Lake Macquarie G.18732	xamachana G.18732	0.81	8	2	1.02	1.06	1.25	1.04	1.41	1.18	1.08	1.04	6.51	7.05	6.22	6.63	7.37	1	2	4	2	1	2	4	3	1
G.18365	Lake Macquarie	xamachana	Lake Macquarie G.18365	xamachana G.18365	1.35	8	2	1.05	1.15	1.39	1.1	2.24	1.23	1.14	1.04	8.03	6.07	6.06	5.76	6.09	2	6	2	2	1	2	4	3	1
G.18362	Lake Macquarie	xamachana	Lake Macquarie G.18362	xamachana G.18362	1.28	8	2	1.03	1.14	1.41	1.11	1.83	1.3	1.2	1.05	6.95	6.07	5.91	6.63	6.09	2	6	4	2	1	2	4	3	1
G.18730	Lake Macquarie	xamachana	Lake Macquarie G.18730	xamachana G.18730	0.83	8	2	1.02	1.08	1.34	1.06	1.36	1.23	1.13	1.06	6.38	6.07	6.38	5.76	6.86	1	5	4	2	1	2	4	3	1
G.18733	Lake Macquarie	xamachana	Lake Macquarie G.18733	xamachana G.18733	0.76	7	2	1.02	1.03	1.39	1.01	1.35	1.16	1.09	1.08	6.89	7.05	5.91	6.63	7.62	1	5	4	2	1	2	4	3	1
G.18362	Lake Macquarie	xamachana	Lake Macquarie G.18362	xamachana G.18362	2.68	8	1	1.03	1.1	1.35	1.07	1.85	1.25	1	1.07	7.33	6.07	5.59	7.49	4.81	1	6	4	2	1	2	4	3	1
G.18731	Lake Macquarie	xamachana	Lake Macquarie G.18731	xamachana G.18731	0.81	8	2	1.08	1.14	1.37	1.06	1.57	1.21	1.11	1.06	6.51	6.07	6.14	7.49	7.62	1	2	4	2	1	2	6	3	1
G.18362	Lake Macquarie	xamachana	Lake Macquarie G.18362	xamachana G.18362	1.12	8	3	1.03	1.1	1.37	1.07	1.86	1.18	1.15	1.05	7.02	5.08	14.41	6.63	7.11	2	6	4	2	1	2	4	3	1
G.18362	Lake Macquarie	xamachana	Lake Macquarie G.18362	xamachana G.18362	1.28	8	2	1.04	1.14	1.42	1.1	1.87	1.23	1.16	1.05	7.4	5.08	6.54	7.49	6.86	2	6	4	2	1	2	4	3	1
G.18723	Lake Macquarie	xamachana	Lake Macquarie G.18723	xamachana G.18723	1.42	8	2	1.03	1.07	1.37	1.04	1.17	1.22	1.16	1.06	6.57	6.07	5.83	7.49	7.37	1	5	4	2	1	2	5	3	1
G.18721	Lake Macquarie	xamachana	Lake Macquarie G.18721	xamachana G.18721	1.12	8	2	1.03	1.07	1.31	1.04	1.35	1.25	1.1	1.03	6.38	7.05	5.83	5.76	6.09	1	6	4	2	1	2	6	3	1
G.18725	Lake Macquarie	xamachana	Lake Macquarie G.18725	xamachana G.18725	1.32	8	2	1.03	1.12	1.33	1.09	1.47	1.26	1.16	1.06	6.45	6.07	5.91	5.76	6.34	1	1	4	2	1	2	4	3	1
G.18720	Lake Macquarie	xamachana	Lake Macquarie G.18720	xamachana G.18720	0.8	8	2	1.03	1.1	1.4	1.07	1.5	1.23	1.11	1.05	6	6.07	6.38	7.49	8.39	1	1	4	2	1	2	4	3	1
G.18364	Lake Macquarie	xamachana	Lake Macquarie G.18364	xamachana G.18364	1.49	8	2	1.04	1.13	1.37	1.09	1.52	1.23	1.11	1.04	7.21	6.07	5.83	7.49	5.83	2	6	2	2	1	2	4	3	1
G.18363	Lake Macquarie	xamachana	Lake Macquarie G.18363	xamachana G.18363	1.09	8	2	1.03	1.14	1.39	1.1	1.57	1.14	1.11	1.03	5.75	6.07	5.91	7.49	5.83	2	5	4	2	1	2	4	3	1
G.18735	Lake Macquarie	xamachana	Lake Macquarie G.18735	xamachana G.18735	1.2	8	1	1.02	1.09	1.47	1.07	1.42	1.2	1.07	1.06	6.64	8.04	5.67	6.63	7.37	1	5	4	2	1	2	4	3	1
G.18722	Lake Macquarie	xamachana	Lake Macquarie G.18722	xamachana G.18722	1.55	8	2	1.02	1.09	1.38	1.07	1.19	1.2	1.17	1.04	6.64	7.05	5.83	6.63	5.83	1	5	3	2	1	2	4	3	1
G.18728	Lake Macquarie	xamachana	Lake Macquarie G.18728	xamachana G.18728	1.5	6	1	1.03	1.12	1.35	1.1	1.62	1.31	1.11	1.09	6.19	6.07	5.91	5.76	6.86	1	5	4	2	1	2	4	3	1
G.18726	Lake Macquarie	xamachana	Lake Macquarie G.18726	xamachana G.18726	1.33	8	2	1.03	1.09	1.4	1.06	1.33	1.25	1.12	1.1	5.94	7.05	5.91	4.9	5.83	1	6	4	2	1	2	4	3	1
G.18428	Lake Macquarie	xamachana	Lake Macquarie G.18428	xamachana G.18428	1.49	8	2	1.06	1.11	1.35	1.05	1.67	1.16	1.14	1.04	7.27	5.08	5.91	6.63	6.34	2	6	2	2	1	2	4	3	1
G.18362	Lake Macquarie	xamachana	Lake Macquarie G.18362	xamachana G.18362	1.22	8	2	1.02	1.12	1.4	1.1	1.84	1.25	1.18	1.05	6.64	7.05	5.91	5.76	6.6	1	6	4	2	1	2	4	3	1
G.17363	Northern Territory	sp3	Northern Territory G.17363	sp3 G.17363	3.33	8	11	1.02	1.07	1.51	1.05	1	1	1.12	1	6.19	6.07	5.59	4.9	5.06	1	6	4	2	2	1	1	1	1
G.17374	Northern Territory	sp3	Northern Territory G.17374	sp3 G.17374	3.09	7	2	1.01	1.04	1.37	1.03	1	1	1.13	1	5.31	4.1	5.75	4.9	5.06	1	6	3	2	4	1	1	1	1
G.20069	Pelican Waters	xamachana	Pelican Waters G.20069	xamachana G.20069	1.16	8	2	1.03	1.13	1.35	1.1	1.19	1.15	1.12	1.03	6.57	6.07	5.91	5.76	6.34	2	6	4	2	1	2	4	3	1
G.20068	Pelican Waters	xamachana	Pelican Waters G.20068	xamachana G.20068	1.12	8	2	1.03	1.11	1.42	1.07	1.25	1.12	1.19	1.03	6	6.07	6.06	6.63	7.62	2	3	4	2	1	2	4	1	1
G.326486	Pelican Waters	xamachana	Pelican Waters G.326486	xamachana G.326486	1.09	8	2	1.02	1.11	1.34	1.09	1.11	1.19	1.12	1.02	7.21	6.07	6	7.49	5.83	1	5	4	1	1	2	4	3	1
G.17387	PNG	sp2	PNG G.17387	sp2 G.17387	3.08	8	4	1.02	1.04	1.31	1.02	1.19	1.31	1.12	1.02	5.69	6.07	5.59	4.04	5.06	1	3	1	1	1	1	5	3	1
G.17385	PNG	sp2	PNG G.17385	sp2 G.17385	2.21	8	2	1.01	1.04	1.38	1.03	1	1	1.3	1	5.05	5.08	5.75	5.76	5.32	1	6	3	1	3	2	1	1	1
G.17385	PNG	sp2	PNG G.17385	sp2 G.17385	2.19	8	2	1.01	1.05	1.3	1.04	1	1	1.18	1	4.67	6.07	5.75	5.76	5.32	1	3	4	1	3	2	1	1	1
G.17370	PNG	sp2	PNG G.17370	sp2 G.17370	1.91	8	4	1.01	1.09	1.37	1.08	1.34	1.22	1.11	1.09	6.19	6.07	5.83	4.9	5.06	1	6	2	2	4	1	4	3	1
G.17385	PNG	sp2	PNG G.17385	sp2 G.17385	1.52	8	2	1.02	1.07	1.39	1.05	1	1	1.19	1	5.37	6.07	5.83	4.9	5.32	1	6	4	2	1	1	1	1	1
G.17385	PNG	sp2	PNG G.17385	sp2 G.17385	1.78	8	2	1.01	1.04	1.38	1.03	1	1	1.13	1	4.86	6.07	5.75	5.76	5.57	1	6	4	1	2	1	1	1	1
G.20076	Port Hacking	sp3	Port Hacking	sp3 G.20076	1.56	8	8	1.03	1.14	1.38	1.11	1.16	1.13	1.16	1.02	6.95	6.07	5.75	4.9	5.32	2	5	4	2	2	1	4	1	3
G.20076	Port Hacking	sp3	Port Hacking	sp3 G.20076	1.84	8	5	1.08	1.16	1.38	1.03	1.11	1.17	1.18	1.03	5.69	6.07	5.75	4.9	5.32	2	5	2	2	2	1	5	1	3
G.20076	Port Hacking	sp3	Port Hacking	sp3 G.20076	2.19	8	5	1.05	1.14	1.44	1.08	1.14	1.16	1.19	1.03	5.69	6.07	5.75	4.9	5.32	2	4	2	2	2	1	5	1	3
G.20076	Port Hacking	sp3	Port Hacking	sp3 G.20076	1.52	8	6	1.06	1.1	1.38	1.04	1.09	1.13	1.14	1.03	6	6.07	5.75	4.9	5.32	2	4	2	2	4	1	5	1	3
G.20076	Port Hacking	sp3	Port Hacking	sp3 G.20076	1.45	8	6	1.05	1.13	1.29	1.05	1.09	1.13	1.15	1.03	5.69	5.08	5.75	6.63	5.32	2	5	2	2	4	1	5	1	3
G.20076	Port Hacking	sp3	Port Hacking	sp3 G.20076	1.21	8	5	1.11	1.05	1.26	1.06	1.08	1.15	1.16	1.04	5.69	5.08	5.91	5.76	5.32	2	5	4	2	2	1	5	1	2
G.20076	Port Hacking	sp3	Port Hacking	sp3 G.20076	1.57	8	10	1.03	1.1	1.38	1.07	1.24	1.16	1.16	1.03	7.97	6.07	5.75	4.9	5.57	2	5	4	2	2	1	6	2	2
G.18139	Wallis Lake	xamachana	Wallis Lake G.18139	xamachana G.18139	2.34	8	2	1.04	1.09	1.43	1.05	1.91	1.27	1.17	1.05	6.38	6.07	5.75	5.76	5.57	1	3	2	2	1	2	4	3	1
G.18139	Wallis Lake	xamachana	Wallis Lake G.18139	xamachana G.18139	2.21	8	2	1.03	1.09	1.38	1.06	1.65	1.27	1.18	1.05	6.7	5.08	5.75	4.9	5.32	1	6	2	2	1	2	6	3	1
G.18139	Wallis Lake	xamachana	Wallis Lake G.18139	xamachana G.18139	2.07	8	2	1.03	1.13	1.34	1.1	1.98	1.28	1.23	1.07	7.27	6.07	5.75	4.9	5.83	2	5	1	2	1	2	4	3	1
G.18738	Wallis Lake	xamachana	Wallis Lake G.18738	xamachana G.18738	1.69	8	2	1.03	1.09	1.3	1.06	1.11	1.27	1.12	1.04	5.43	6.07	5.67	6.63	5.57	1	5	4	2	1	2	6	3	1
G.18754	Wallis Lake	xamachana	Wallis Lake G.18754	xamachana G.18754	1.64	8	3	1.06	1.1	1.18	1.04	1.18	1.13	1.07	1.05	6.32	6.07	5.83	4.9	5.06	1	6	4	2	1	2	3	3	1
G.18139	Wallis Lake	xamachana	Wallis Lake G.18139	xamachana G.18139	1.63	8	2	1.04	1.09	1.4	1.05	1.96	1.28	1.18	1.09	6	6.07	5.83	5.76	7.11	1	6	2	2	1	2	4	3	1
G.18753	Wallis Lake	xamachana	Wallis Lake G.18753	xamachana G.18753	1.33	8	2	1.05	1.13	1.38	1.08	1.33	1.22	1.1	1.06	4.67	5.08	5.83	4.9	6.6	1	5	4	2	1	2	4	3	1
G.18144	Wallis Lake	xamachana	Wallis Lake G.18144	xamachana G.18144	2.12	8	1	1.13	1.27	1.35	1.13	1.19	1.15	1	1.02	3.72	6.07	5.59	4.9	4.81	2	5	2	2	1	2	5	3	1
G.18139	Wallis Lake	xamachana	Wallis Lake G.18139	xamachana G.18139	1.61	8	2	1.03	1.12	1.38	1.09	1.98	1.28	1.23	1.1	6.95	7.05	5.91	5.76	5.57	1	6	2	2	1	2	4	3	1
G.18139	Wallis Lake	xamachana	Wallis Lake G.18139	xamachana G.18139	1.74	8	2	1.02	1.17	1.43	1.15	2.4	1.28	1.16	1.05	6.26	6.07	5.83	5.76	5.83	2	6	4	2	1	2	4	3	1
G.18139	Wallis Lake	xamachana	Wallis Lake G.18139	xamachana G.18139	2.02	8	2	1.04	1.17	1.41	1.14	2.01	1.27	1.15	1.06	6.13	6.07	5.83	5.76	5.57	2	6	3	2	1	2	4	3	1
G.18139	Wallis Lake	xamachana	Wallis Lake G.18139	xamachana G.18139	1.42	8	1	1.06	1.17	1.46	1.11	1.87	1.28	1	1.11	6.76	6.07	5.91	5.76	4.81	2	6	1	2	1	2	6	3	1
G.18750	Wallis Lake	xamachana	Wallis Lake G.18750	xamachana G.18750	0.82	8	2	1.03	1.11	1.25	1.08	1.21	1.16	1.1	1.04	4.67	5.08	5.99	4.9	8.91	1	6	4	2	1	2	6	3	1
G.18746	Wallis Lake	xamachana	Wallis Lake G.18746	xamachana G.18746	1.26	7	2	1.02	1.06	1.29	1.04	1.33	1.15	1.07	1.04	6.57	6.07	5.83	6.63	6.34	1	5	4	2	1	2	4	3	1
G.18139	Wallis Lake	xamachana	Wallis Lake G.18139	xamachana G.18139	1.33	8	2	1.04	1.19	1.42	1.15	2.42	1.28	1.19	1.11	5.05	5.08	5.91	5.76	5.83	2	3	4	2	1	2	4	3	1
G.18748	Wallis Lake	xamachana	Wallis Lake G.18748	xamachana G.18748	1.15	8	2	1.02	1.08	1.29	1.05	1.15	1.18	1.14	1.06	5.88	6.07	5.67	6.63	6.86	1	6	4	2	1	2	4	3	1
G.18752	Wallis Lake	xamachana	Wallis Lake G.18752	xamachana G.18752	1.19	8	3	1.03	1.12	1.35	1.09	1.26	1.23	1.21	1.07	5.18	5.08	6.06	7.49	7.62	1	5	4	2	1	2	6	3	1
G.18745	Wallis Lake	xamachana	Wallis Lake G.18745	xamachana G.18745	0.84	8	2	1.02	1.06	1.34	1.04	1.26	1.18	1.14	1.04	6.95	8.04	6.22	6.63	6.86	1	1	4	2	1	2	4	3	1
G.18755	Wallis Lake	xamachana	Wallis Lake G.18755	xamachana G.18755	0.82	8	5	1.07	1.12	1.33	1.05	1.19	1.2	1.15	1.04	4.93	5.08	6.46	9.22	7.62	1	6	4	2	1	2	3	3	1
G.18742	Wallis Lake	xamachana	Wallis Lake G.18742	xamachana G.18742	0.82	8	2	1.03	1.09	1.37	1.07	1.26	1.21	1.19	1.06	7.4	7.05	6.22	7.49	7.62	1	1	4	2	1	2	4	3	1
G.18739	Wallis Lake	xamachana	Wallis Lake G.18739	xamachana G.18739	0.67	8	3	1.06	1.09	1.31	1.03	1.5	1.21	1.11	1.04	6.13	6.07	6.06	7.49	6.34	1	2	4	2	1	2	4	3	1
G.18741	Wallis Lake	xamachana	Wallis Lake G.18741	xamachana G.18741	0.64	8	2	1.07	1.15	1.35	1.08	1.37	1.23	1.16	1.05	6.51	6.07	6.14	6.63	9.42	1	1	4	2	1	2	4	3	1
G.18749	Wallis Lake	xamachana	Wallis Lake G.18749	xamachana G.18749	0.72	8	2	1.04	1.13	1.35	1.09	1.36	1.18	1.13	1.06	7.4	8.04	6.38	7.49	6.86	1	5	4	2	1	2	4	3	3
G.18139	Wallis Lake	xamachana	Wallis Lake G.18139	xamachana G.18139	2.81	8	2	1.03	1.13	1.36	1.09	1.63	1.27	1.14	1.05	5.5	5.08	5.59	5.76	5.32	1	6	1	2	1	2	6	3	1
G.18736	Wallis Lake	xamachana	Wallis Lake G.18736	xamachana G.18736	0.67	8	2	1.01	1.04	1.39	1.02	1.33	1.18	1.15	1.05	6.83	8.04	5.91	6.63	7.62	1	6	4	2	1	2	4	3	3
G.18154	Wallis Lake	xamachana	Wallis Lake G.18154	xamachana G.18154	1.24	8	1	1.03	1.16	1.4	1.13	1.82	1.2	1	1.07	5.5	5.08	5.83	5.76	4.81	2	6	4	2	1	2	4	3	1
G.18149	Wallis Lake	xamachana	Wallis Lake G.18149	xamachana G.18149	1.82	8	1	1.02	1.14	1.36	1.11	1.45	1.19	1	1.05	6.13	7.05	5.75	4.9	4.81	2	5	2	2	1	2	4	3	1
G.18148	Wallis Lake	xamachana	Wallis Lake G.18148	xamachana G.18148	1.82	8	2	1.03	1.1	1.35	1.07	1.34	1.17	1.09	1.05	5.81	5.08	5.75	5.76	5.32	2	6	1	2	1	2	6	3	1
G.18153	Wallis Lake	xamachana	Wallis Lake G.18153	xamachana G.18153	1.35	8	2	1.01	1.15	1.38	1.14	1.42	1.15	1.09	1.03	5.56	6.07	5.67	4.9	5.19	2	5	2	2	1	2	4	3	1
G.18152	Wallis Lake	xamachana	Wallis Lake G.18152	xamachana G.18152	1.17	8	2	1.03	1.15	1.43	1.12	1.49	1.14	1.12	1.03	3.79	6.07	5.91	5.76	5.57	1	5	4	2	1	2	4	3	1
G.18137	Wallis Lake	xamachana	Wallis Lake G.18137	xamachana G.18137	1.22	8	2	1.04	1.12	1.36	1.08	1.73	1.2	1.15	1.07	5.88	7.05	5.83	5.76	6.09	2	5	2	2	1	2	4	3	1
G.18156	Wallis Lake	xamachana	Wallis Lake G.18156	xamachana G.18156	2.5	8	2	1.03	1.08	1.36	1.05	1.31	1.06	1.06	1.02	3.15	6.07	5.67	4.9	5.06	2	3	1	2	1	2	4	2	1
G.18156	Wallis Lake	xamachana	Wallis Lake G.18156	xamachana G.18156	2.03	8	2	1.05	1.11	1.38	1.06	1.63	1.23	1	1.03	5.12	7.05	5.67	5.76	4.81	2	6	1	2	1	1	4	3	1
G.18156	Wallis Lake	xamachana	Wallis Lake G.18156	xamachana G.18156	2.5	8	2	1.03	1.06	1.38	1.03	1.42	1.18	1.1	1.04	6.19	5.08	5.67	5.76	5.32	2	6	4	2	1	2	6	3	1
G.18156	Wallis Lake	xamachana	Wallis Lake G.18156	xamachana G.18156	2.18	8	1	1.03	1.08	1.28	1.05	1.51	1.21	1	1.03	5.81	6.07	5.75	4.9	4.81	2	5	1	2	1	2	6	3	1
